## **The glycosyltransferase UGT76B1 is critical for plant immunity as it governs the homeostasis of *N*-hydroxy-pipecolic acid**

**Lennart Mohnike<sup>1,5</sup>, Dmitrij Rekhter<sup>1,5</sup>, Weijie Huang<sup>2,5</sup>, Kirstin Feussner<sup>1,3</sup>, Hainan Tian<sup>2</sup>, Cornelia Herrfurth<sup>1,3</sup>, Yuelin Zhang<sup>2,\*</sup> and Ivo Feussner<sup>1,3,4,\*</sup>**

<sup>1</sup>University of Goettingen, Albrecht-von-Haller-Institute for Plant Sciences, Department of Plant Biochemistry, D-37077 Goettingen, Germany.

<sup>2</sup>University of British Columbia, Department of Botany, Vancouver, BC V6T 1Z4, Canada.

<sup>3</sup>University of Goettingen, Goettingen Center for Molecular Biosciences (GZMB), Service Unit for Metabolomics and Lipidomics, D-37077 Goettingen, Germany.

<sup>4</sup>University of Goettingen, Goettingen Center for Molecular Biosciences (GZMB), Department of Plant Biochemistry, D-37077 Goettingen, Germany.

<sup>5</sup>These authors contributed equally to this work

\*Correspondence: Ivo Feussner, E-mail: [ifeussn@uni-goettingen.de](mailto:ifeussn@uni-goettingen.de), ORCID iD: 0000-0002-9888-7003; Yuelin Zhang, E-mail: [yuelin.zhang@ubc.ca](mailto:yuelin.zhang@ubc.ca), ORCID iD: 0000-0002-3480-5478.

**Short title:** Glycosylation of NHP is catalyzed by UGT76B1 in plant immunity

**One-sentence summary:** UGT76B1 regulates the homeostasis of NHP in *Arabidopsis thaliana* by the formation of NHP-OGlc.

## Abstract

The trade-off between growth and defense is a critical aspect of plant immunity. Therefore, plant immune response needs to be tightly regulated. The hormone regulating plant defense against biotrophic pathogens is salicylic acid (SA). Recently, *N*-hydroxy-pipecolic acid (NHP) was identified as second regulator for plant innate immunity and systemic acquired resistance. Although the biosynthetic pathway leading to NHP formation has already been identified, the route how NHP is further metabolized was unclear. Here, we present UGT76B1 as a UDP-dependent glycosyltransferase that modifies NHP by catalyzing the formation of 1-*O*-glucosyl-pipecolic acid (NHP-OGlc). Analysis of T-DNA and CRISPR knock-out mutant lines of *UGT76B1* by targeted and non-targeted UHPLC-HRMS underlined NHP and SA as endogenous substrates of this enzyme in response to *Pseudomonas* infection and UV treatment. UGT76B1 shows similar  $K_M$  for NHP and SA. *ugt76b1* mutant plants have a dwarf phenotype and a constitutive defense response which can be suppressed by loss of function of the NHP biosynthetic enzyme FMO1. This suggests that elevated accumulation of NHP contributes to the enhanced disease resistance in *ugt76b1*. Externally applied NHP can move to distal tissue in *ugt76b1* mutant plants. Although glycosylation is not required for the long distance movement of NHP during systemic acquired resistance, it is crucial to balance growth and defense.

## 1 Introduction

2 Plants are constantly exposed to biotic and abiotic stress. To deal with external threats, plants have  
3 developed an impressive repertoire of chemical compounds. However, there is a trade-off between defense  
4 and growth as shown in autoimmune mutants such as *snc2-1D npr1-1* and *s3h s5h*, which accumulate high  
5 levels of defense hormones and exhibit severe dwarf phenotypes (Zhang et al., 2010; Zhang et al., 2017). In  
6 order to balance between growth and defense, plants oversee the homeostasis of these compounds  
7 constantly. Dynamic changes of the levels of immune signaling molecules allow plants to react rapidly and  
8 appropriately to danger (Hartmann and Zeier, 2019; Huang et al., 2020). The biosynthesis, transport, and  
9 homeostasis of the signaling molecules is therefore, strictly regulated to prevent unintended consequences.

10 Two signaling molecules, salicylic acid (SA) and *N*-hydroxy-pipecolic acid (NHP), are particularly  
11 important in plant defense against biotrophic pathogens. Together they orchestrate the immune response in  
12 the local tissue to prevent pathogen spread (Hartmann et al., 2018; Guerra et al., 2020). Locally produced  
13 defense signals are further translocated to distal parts of the plant, leading to massive transcriptional and  
14 metabolic reprogramming in the naïve tissues, which enables a quick and robust response to subsequent  
15 infections (Bernsdorff et al., 2016). This induced immunity in distal tissue is termed systemic acquired  
16 resistance (SAR). Most of the signaling molecules participating in the induction of SAR can be found in the  
17 phloem upon infection (Fu and Dong, 2013). The effect of SA and NHP in the context of plant immunity

18 has been well documented (Chen et al., 2018; Hartmann et al., 2018; Zhang and Li, 2019; Huang et al.,  
19 2020).

20 Biosynthesis of SA is divided into two major routes that result in SA formation in planta: The  
21 phenylpropanoid or PHENYLAMMONIA LYASE (PAL)-pathway and the ISOCHORISMIC ACID  
22 SYNTHASE 1 (ICS1)-pathway (Yalpani et al., 1993; Wildermuth et al., 2001). Nevertheless, in *Arabidopsis*  
23 about 90% of endogenous SA derives from chloroplast-derived isochorismic acid, which is exported to the  
24 cytosol via ENHANCED DISEASE SUSCEPTIBILITY 5 (EDS5) and conjugated to glutamate by AvrPphB  
25 SUSCEPTIBLE 3 (PBS3). The formed isochorismic acid-9-glutamic acid then spontaneously decomposes  
26 into SA and enolpyruvyl-*N*-glutamic acid (Rekhter et al., 2019b). Furthermore, ENHANCED  
27 PSEUDOMONAS SUSCEPTIBILITY 1 (EPS1) has been shown to enhance SA formation from  
28 isochorismic acid-9-glutamic acid (Torrens-Spence et al., 2019).

29 NHP was recently discovered as a signaling compound for plant defense against biotrophic  
30 pathogens (Chen et al., 2018; Hartmann et al., 2018). So far, research has focused on the biosynthesis of  
31 NHP from lysine. In the first step, the  $\alpha$ -aminotransferase AGD2-LIKE DEFENSE RESPONSE PROTEIN  
32 1 (ALD1) catalyzes the transamination of lysine into  $\epsilon$ -amino- $\alpha$ -keto caproic acid (Song et al., 2004;  
33 Navarova et al., 2012; Vogel-Adghough et al., 2013). This compound spontaneously cyclizes and thereby  
34 yields  $\Delta^1$ -piperidine-2-carboxylic acid (P2C). In a second step, the ketimine reductase SAR DEFICIENT  
35 4 (SARD4) catalyzes the formation of pipercolic acid (Pip) from P2C (Ding et al., 2016; Hartmann et al.,  
36 2017). Pip requires *N*-hydroxylation in order to reach its full protective capacity. This activation is catalyzed  
37 by FLAVIN-DEPENDENT MONOOXYGENASE 1 (FMO1) (Chen et al., 2018; Hartmann et al., 2018).

38 One important strategy to maintain a preferred concentration of an active metabolite is chemical  
39 modification, which can change the bioavailability and activity of the compound. Different modifications  
40 of SA such as hydroxylation and methylation have been described (Song et al., 2009; Zhang et al., 2017).  
41 SA itself as well as its catabolites can be further xylosylated (addition of the pentose xylose) and  
42 glycosylated (addition of a hexose) (Song et al., 2008; Bartsch et al., 2010; Huang et al., 2018). The transfer  
43 of an activated sugar moiety onto a target molecule is predominantly catalyzed by the widespread enzyme  
44 family of uridine diphosphate (UDP)-DEPENDENT GLYCOSYL TRANSFERASES (UGTs). The closely  
45 related UGT74F1 and UGT74F2 catalyze the formation SA-glycoside (SAG) and SA glucose ester (SGE)  
46 respectively (Dean and Delaney, 2008; George Thompson et al., 2017). Another enzyme UGT71C3 was  
47 recently shown to be responsible for the biosynthesis of methyl-SA glycoside (Chen et al., 2019). Despite  
48 the high abundance of these glycosides upon stress, the biological significance of the formation of these  
49 compounds is still elusive. Blocking glycosylation of SA has been shown to result in enhanced disease  
50 resistance (Noutoshi et al., 2012). In tobacco SAG is transported from the cytosol into vacuoles, suggesting

51 that the glucosides are a storage form of SA. On the other hand, the formation of SAG may be important for  
52 the vascular transport, as there is evidence that SAG can be hydrolyzed back into SA in the extracellular  
53 space (Hennig et al., 1993; Seo et al., 1995).

54 So far, only one metabolite of NHP was identified, namely NHP-glycoside (NHP-OGlc) (Chen et  
55 al., 2018; Hartmann et al., 2018). Intriguingly, externally supplied NHP can be found in distal tissues in  
56 uninfected *fmo1* mutant plants as NHP and NHP-OGlc, suggesting that at least one of these molecules is  
57 mobile *in planta* (Chen et al., 2018). Currently, neither the function of NHP-OGlc nor the enzyme that  
58 catalyzes the glycosylation of NHP was identified. Here we report that UGT76B1, which was previously  
59 reported to glycosylate SA and 2-hydroxy-3-methyl-pentanoic acid (isoleucic acid, ILA), catalyzes the  
60 formation of NHP-OGlc (von Saint Paul et al., 2011; Noutoshi et al., 2012; Maksym et al., 2018). UGT76B1  
61 has strong *in vitro* activity towards NHP and no detectable amount of NHP-OGlc is synthesized in *ugt76b1*  
62 mutant plants, which results in increased NHP accumulation, a dwarf phenotype and enhanced disease  
63 resistance against biotrophic pathogens. Moreover, we show that externally applied NHP is mobile to distal  
64 tissue in the absence of UGT76B1 and that transport of NHP seems not to depend on further glycosylation.

## 65 **Results**

### 66 **Non-targeted metabolome analysis of infected leaf tissue revealed NHP as *in vivo* substrate of** 67 **UGT76B1**

68 Searching for the protein that catalyzes the formation of NHP-OGlc, we found *UGT76B1* as a recurring  
69 candidate gene in several studies (von Saint Paul et al., 2011; Noutoshi et al., 2012; Gruner et al., 2013;  
70 Hartmann et al., 2018). The loss-of-function mutant *ugt76b1-1* showed enhanced resistance against  
71 *Pseudomonas* infections (von Saint Paul et al., 2011; Noutoshi et al., 2012; Maksym et al., 2018). Although  
72 UGT76b1 has previously been shown to exhibit SA glycosyltransferase activity, the enzyme has a high level  
73 of substrate promiscuity *in vitro*. Additional substrates are ILA, leucic acid, 2-ethyl-2-hydroxybutyric acid  
74 and valic acid (von Saint Paul et al., 2011; Noutoshi et al., 2012; Maksym et al., 2018). Since UGT76B1  
75 has been shown to influence SA metabolism, we wondered if UGT76B1 has other substrates *in vivo*.

76 We conducted a non-targeted metabolome analysis on Col-0 and *ugt76b1-1* leaves after mock or  
77 *Pseudomonas* treatment. The dataset obtained by the non-targeted UPLC-HRMS analysis contains 448  
78 metabolite features (false discovery rate (FDR) < 0.005), which were arranged into 7 cluster by means of  
79 one-dimensional self-organizing maps. NHP-OGlc was not detectable in infected *ugt76b1-1* mutant plants  
80 and SAG was strongly reduced compared to the *P.s.m.* infected wild type plants (Col-0; Figure 1, cluster 1).  
81 In contrast to that, NHP and SA showed a three- respective two- fold accumulation in infected *ugt76b1-1*  
82 plants compared to the respective wild type plants (cluster 3). Interestingly, the NHP precursor Pip as well

83 as 2HNG as fragment of the SA-precursor isochorismic acid-9-glutamic acid showed comparable amounts  
84 in infected wild type and *ugt76b1-1* mutant plants (cluster 2). We could not find evidences for additional  
85 substrates or products of UGT76B1 under our conditions with the non-targeted approach. However, we  
86 detected increased levels of the second SA-derived metabolite SGE in *ugt76b1-1* plants after infection  
87 (cluster 3). Together the experiment lead to the identification of NHP as *in vivo* substrate of UGT76B1.

### 88 **UGT76B1 loss-of-function mutant plants do not accumulate NHP-OGlc**

89 In addition to non-targeted metabolome analysis we quantitatively analyzed the amount of NHP, NHP-  
90 OGlc, SA and SAG in wild type (Col-0), *fmo1-1* and *ugt76b1-1* plants after infection with *Pseudomonas*  
91 *syringae* ES4326 (Figure 2a). 24 hours post infection (hpi), wild type plants accumulated NHP and NHP-  
92 OGlc to levels of 68 and 89 nmol/g FW, as well as of SA and SAG to 7 and 166 nmol /g FW, respectively.  
93 *ugt76b1-1* plants exhibited a nearly three-fold higher accumulation of NHP (184 nmol/g FW) compared to  
94 wild type, whereas NHP-OGlc was not detected in the mutant after infection. As expected, *fmo1-1* plants,  
95 which cannot generate NHP from Pip, accumulated neither NHP nor NHP-OGlc. Additionally, we observed  
96 an about 2.5-fold higher accumulation of SA after infection in *ugt76b1-1* plants compared to wild type,  
97 whereas *fmo1-1* plants exhibited comparable SA levels to the wild type, and moderately reduced SAG levels.

98 Similar results were obtained when we used UV-C to stimulate the production of NHP and SA  
99 independently of pathogen infection (Yalpani et al., 1994; Rekhter et al., 2019a). 24 h post UV-C-treatment,  
100 we detected 56 and 131 nmol/g FW of NHP and NHP-OGlc as well as 1.74 and 73 nmol/g FW of SA and  
101 SAG in wild type plants (Figure 2b). In *fmo1-1* plants, no detectable amounts of NHP and NHP-OGlc were  
102 found after UV-C treatment, while SA and SAG accumulated to wild type levels. In *ugt76b1-1* plants, we  
103 observed a nearly three-fold increase in NHP compared to wild type plants, but no formation of NHP-OGlc  
104 was detectable. There is also an increase in SA accumulation (2.87 nmol/g FW) and decrease in SAG  
105 accumulation (27 nmol/g FW) in *ugt76b1-1*. Together, these data strengthen the hypothesis that NHP-OGlc  
106 formation is dependent on a functional UGT76B1 enzyme, as additionally confirmed with two independent  
107 deletion mutant alleles of *UGT76B1* (Figure S1).

### 108 **UGT76B1 acts downstream of FMO1 thereby regulating plant immunity**

109 We hypothesized that increased NHP accumulation in *ugt76b1-1* plants after infection is due to its impaired  
110 glycosylation and that the dwarfed and enhanced resistance phenotype requires NHP. Furthermore, we  
111 assumed that UGT76B1 acts downstream of FMO1. To test this hypotheses, we checked growth of  
112 *Hyaloperonospora arabidopsis* (*H. a.*) Noco 2 on Col-0, *fmo1-1*, *FMO1-3D* (a gain-of-function mutant for  
113 *FMO1*), three mutant alleles of *UGT76B1* (*ugt76b1-1*, -3 and -4) and three *fmo1-1 ugt76b1* double knock-  
114 out mutant lines (*fmo1-1 ugt76b1-5*, *fmo1-1 ugt76b1-1-40* and *fmo1-1 ugt76b1-1-104*; Figure 3). In

115 comparison to Col-0, *FMO1*-3D showed high resistance against *H. a. Noco* 2, while *fmo1*-1 was more  
116 susceptible. *ugt76b1*-1, -3 and -4 exhibited strong resistance, but the double mutant lines showed similar  
117 susceptibility as *fmo1*-1 (Figure 3a). Additionally, we found that basal *PR1* gene expression is enhanced in  
118 all three *ugt76b1* alleles compared to Col-0 (Figure 3b), consistent with findings from a previous report (von  
119 Saint Paul et al., 2011). In contrast, the expression level of *PR1* is similar in *fmo1*-1 *ugt76b1*-5 and *fmo1*-1.  
120 In addition, the dwarf phenotype and dark green leaf color in the *ugt76b1* alleles are suppressed in the *fmo1*-  
121 1 *ugt76b1*-5 double mutant (Figure 3c). The *fmo1*-1 *ugt76b1*-1 double mutant plants accumulate neither  
122 NHP nor NHP-OGlc (Figure S2). Altogether, the data indicate that UGT76B1 acts downstream of FMO1  
123 and that NHP is required for both the enhanced resistance and dwarf phenotype of *ugt76b1* plants.

#### 124 **Increased accumulation of NHP in *ugt76b1* plants underlines the importance of turnover via** 125 **UGT76B1**

126 Next, we wondered whether the enhanced accumulation of NHP and SA in the *ugt76b1* mutants after  
127 infection is due to impaired turnover or increased biosynthesis of NHP and SA. Therefore, we measured the  
128 transcript levels of SA and NHP biosynthetic genes 24 hpi with *Pseudomonas* by quantitative RT-PCR. The  
129 transcript abundance of the SA biosynthetic genes *ICS1*, *EDS5* and *PBS3* (Figure 4a, 4b and 4c) was similar  
130 in the wild type and *ugt76b1*-1 mutant. Interestingly, transcripts of all three genes were upregulated in the  
131 mock-treated *ugt76b1*-1, suggesting that the basal levels of these SA biosynthetic genes are higher in the  
132 *UGT76B1* knock-out background. This is supported by the transcript levels of *PR1* and *PR2* after mock  
133 treatment (Figure S3). Despite the increased amount of NHP (Figure 2a), the transcript levels of NHP-  
134 biosynthetic genes *ALD1* and *FMO1* are significantly reduced in *ugt76b1*-1 compared to wild type. As a  
135 control, we monitored the transcript level of *UGT74F2* in Col-0 and *ugt76b1*-1. The transcript abundance  
136 of *UGT74F2* did not change after infection in Col-0 and *ugt76b1*-1 plants (Figure 4). Taken together, the  
137 increased SA and NHP levels in *ugt76b1* mutants upon pathogen infection is unlikely caused by their  
138 increased biosynthesis, since the respective transcripts are not higher in *ugt76b1*-1 than in wild type. These  
139 findings support that UGT76B1 plays a central role in the turnover of NHP and influences the formation of  
140 SAG.

#### 141 **UGT76B1 catalyzes the glycosylation of NHP *in vitro***

142 In addition, we checked whether UGT76B1 can glycosylate NHP *in vitro*. The His-tagged UGT76B1 was  
143 heterologously expressed in *Escherichia coli* and purified to homogeneity by affinity chromatography and  
144 size exclusion chromatography (Figure S4). The enzymatic reaction of recombinant UGT76B1 with NHP  
145 and UDP-glucose as substrates was monitored by ultra-high performance liquid chromatography coupled to  
146 high-resolution mass spectrometry (UHPLC-HRMS). As shown in Figure 5a, UGT76B1 catalyzes *in vitro*  
147 formation of NHP-OGlc (*m/z* 308.1342, retention time [RT] 2.12 min). We also confirmed glycosylation of

148 SA and ILA by UGT76B1 (von Saint Paul et al., 2011; Noutoshi et al., 2012). The formation of the  
149 respective glucosides SAG ( $m/z$  299.0793, RT 3.14 min) and ILA-glycoside (ILA-Glc) ( $m/z$  293.1240, RT  
150 3.35 min) is shown in Figure 5c and 5b. In addition, we determined the Michaelis-Menten constant ( $K_M$ ) for  
151 SA and NHP. We analyzed the respective product signal area for NHP-OGlc and SAG via UHPLC-HRMS,  
152 resulting in  $K_M(\text{NHP}) = 86 \pm 7 \mu\text{M}$  and  $K_M(\text{SA}) = 90 \pm 7 \mu\text{M}$  (Figure 5d and 5e), which suggest that UGT76B1  
153 has similar affinity towards SA and NHP. Together, our *in vitro* analysis shows that the purified recombinant  
154 UGT76B1 was active with about 5-fold higher affinity towards NHP and SA in comparison to the substrate  
155 ILA (Maksym et al., 2018).

156 We further analyzed active site residues in enzymes capable of glycosylating SA (UGT74F1 and UGT74F2)  
157 and compared them with the UGT76B1 protein sequence (Figure S5a). In addition, we made an *in silico*  
158 structural prediction of UGT76B1 using the deposited structure of UGT74F2 (PDB accession 5V2J,  
159 (George Thompson et al., 2017)) and modeled NHP in the electron density of the co-crystallized SA-  
160 analogue 2-bromobenzoic acid (Figure S5b and S5c). Some residues such as histidine at position 20 (His20)  
161 and aspartic acid at position 109 (Asp109) that have been shown to be important for the formation of SAG  
162 and SGE are conserved in all three UGTs (Figure S5a) (George Thompson et al., 2017). However, two  
163 threonine residues involved in the glycosylation of SA in UGT74F2 are substituted by leucine at position  
164 17 (Leu17) and glycine at position 363 (Gly363) (Figure S5a and S5c). Nevertheless, we identified a  
165 threonine at position 131 in a predicted loop region, which might compensate the lack of Thr17 and Thr363  
166 in the catalytic reaction (Figure S5a and S5c). These findings support our experimental data that the  
167 minimum subset of amino acids for fulfilling the glycosylation reactions on SA and NHP are present in  
168 UGT76B1's putative active site.

### 169 **Deuterated NHP is translocated to distal tissue**

170 NHP is the biological active metabolite of Pip in plant defense, especially in SAR (Chen et al., 2018;  
171 Hartmann et al., 2018). Nevertheless, it is still an open question whether NHP or NHP-OGlc might act as a  
172 mobile signal in SAR (Chen et al., 2018; Holmes et al., 2019). To address this question, we infiltrated  
173 uniformly deuterated NHP ( $D_9$ -NHP) into leaves of Col-0, *fmo1-1* and *ugt76b1-1* plants. 24 hours post  
174 infiltration, local as well as systemic leaves were harvested. First, the formation of  $D_9$ -NHP-OGlc that  
175 derived from the infiltrated  $D_9$ -NHP in the local leaves of Col-0, *fmo1-1* and *ugt76b1-1* plants was monitored  
176 by UHPLC-HRMS. As expected, the applied  $D_9$ -NHP was converted to  $D_9$ -NHP-OGlc in the local leaves  
177 of wild type and *fmo1-1* plants, but no  $D_9$ -NHP-OGlc was detectable in *ugt76b1-1* plants (Figure 6).  
178 Accordingly, the relative signal area of  $D_9$ -NHP was two times higher in the local leaves of *ugt76b1-1* plants  
179 in comparison to Col-0. Further analysis showed that  $D_9$ -NHP was present in systemic tissue of the three

180 genotypes Col-0, *fmo1-1* and *ugt76b1-1*, whereas D<sub>9</sub>-NHP-OGlc was only detectable in Col-0 and *fmo1-1*  
181 plants. This indicates that D<sub>9</sub>-NHP can move to distal tissues without glycosylation.

## 182 ***ugt76b1* plants exhibit enhanced resistance in systemic tissue**

183 Next, we analyzed whether *ugt76b1-1* can still establish SAR without the accumulation of NHP-OGlc by  
184 conducting a *H.a. Noco 2* growth assay on plants pre-treated with *Pseudomonas syringae* (Figure 7).  
185 Establishment of SAR strongly reduces the disease rate of distal leaves (indicated as disease categories from  
186 0 to 5) during a second infection with *H.a. Noco 2*, as shown for Col-0 plants (Figure 7a). Plants mock  
187 treated on the primary leaf showed high infection rates, indicated by disease categories of four and five on  
188 the systemic leaves after plant *H.a. Noco 2* infection. For *ugt76b1-1* plants, infection on the systemic leaves  
189 was reduced to minimum (disease category 0) no matter whether they were pre-induced with *Pseudomonas*  
190 or not. These disease rates were as low as those known for the *FMO1-3D* mutant. In contrast, *fmo1-1* plants  
191 are not able to establish SAR and show therefore an increased susceptibility to *H.a. Noco 2* as known from  
192 the literature (Ding et al., 2016). This finding indicates that the distal parts of *ugt76b1-1*, regardless of a  
193 primary infection, exhibit enhanced resistance towards *H.a. Noco 2*. This is consistent with results from our  
194 local *H.a. Noco 2* infection assays for the *ugt76b1* lines (Figure 3a). In an independent approach, we  
195 analyzed the resistance of *ugt76b1-1* to a secondary infection by *Pseudomonas*. As expected, Col-0  
196 established SAR after primary infection, *fmo1-1* plants were not able to establish SAR, and *FMO1-3D*  
197 showed a constitutive SAR phenotype (Figure 7b). Nevertheless, *ugt76b1-1* exhibited reduced bacterial  
198 growth in distal leaves of both mock and *P.s.m.*-treated samples. Together, these data suggest that *ugt76b1-*  
199 *1* displays constitutive resistance towards pathogens.

## 200 **Discussion**

201 The identification of FMO1 as a NHP biosynthetic enzyme was a major breakthrough towards the  
202 understanding of Pip-mediated plant immunity and its involvement in the establishment of SAR (Chen et  
203 al., 2018; Hartmann et al., 2018; Holmes et al., 2019). In addition, NHP-OGlc was recently described as  
204 metabolite of NHP (Chen et al., 2018). However, the enzyme catalyzing the formation of NHP-OGlc was  
205 unknown. In this study, we identified UGT76B1 as the enzyme responsible for the glycosylation of NHP *in*  
206 *vivo* and *in vitro* - in addition to its previously identified substrates SA and ILA. Beside its  
207 glycosyltransferase activity toward NHP *in vitro*, we show that UGT76B1 is required for the formation of  
208 NHP-OGlc *in planta* during pathogen infection. The absence of UGT76B1 leads to a significantly increased  
209 accumulation of NHP, the regulator of plant immunity, and the complete depletion of NHP-OGlc in *ugt76b1*  
210 mutant plants. Our data emphasize UGT76B1 as the only enzyme which glycosylates NHP *in planta*.



211 *ugt76b1* mutants have been shown to exhibit enhanced disease resistance against biotrophic  
212 pathogens, which was suggested to be caused by increased accumulation of SA (Noutoshi et al., 2012). The  
213 substrate ILA was recently suggested to activate immune response via SA by inactivating UGT76B1 (Bauer  
214 et al., 2020). In *ugt76b1* mutants, however, NHP accumulates to considerably higher level than in wild type  
215 during pathogen infection, suggesting that the elevated NHP level instead, may play a major role  
216 contributing to the enhanced disease resistance in the mutant plants. This is supported by the complete  
217 suppression of the autoimmune phenotype of *ugt76b1* by loss of function of FMO1. The accumulation of  
218 NHP leads to dwarfism as reported for the *FMO1-3D* overexpression line. Furthermore, increased NHP  
219 levels leads to enhanced resistance of this mutant (Koch et al., 2006). In contrast, the plant size increases if  
220 the amount of NHP decreases and its susceptibility towards biotrophic pathogen increases (Figure 3 and  
221 Figure 7) (Hartmann et al., 2018). The induction of *UGT76B1* by *Pseudomonas* infection therefore suggests  
222 that it plays a major role in regulating NHP homeostasis, which seems to be critical to balance growth and  
223 defense in plants.

224 Although NHP level is higher in *ugt76b1* mutants, the increased accumulation of SA is most likely  
225 due to the reduced conversion of SA to SAG rather than the effect of NHP on the transcript levels of SA  
226 biosynthesis genes (Figure 4). In addition, the *FMO1-3D* mutant does not accumulate free SA to higher  
227 levels than the wild type and a lack of NHP does not affect the accumulation of SA in *fmo1-1* plants (Koch  
228 et al., 2006; Bartsch et al., 2010). The increase of SA and NHP levels in *ugt76b1* mutants suggest that  
229 reduced turnover could be a critical mechanism for increasing the accumulation of SA as well as NHP  
230 (Figure S6). As there are three UGTs described to glycosylate SA, reduced accumulation of SAG could also  
231 hint for a deregulation mechanism in *ugt76b1-1* plants towards the previously described SA UGTs,  
232 especially SAG-forming enzyme UGT74F1 (Dean and Delaney, 2008; George Thompson et al., 2017).  
233 Increased basal SGE level in *ugt76b1-1* has already been addressed and connected to high basal *PRI*  
234 expression (von Saint Paul et al., 2011). However, after pathogen infiltration with *P.s.m.* transcript levels of  
235 *PRI* are similar in Col-0 and *ugt76b1-1* (Figure S3). Furthermore, the transcript levels of *UGT74F2* coding  
236 for the SGE forming enzyme were similar in wild type and the *ugt76b1-1* mutant. We conclude that the  
237 reported increase of SGE after infection of *ugt76b1-1* is likely caused by the accumulation in UGT74F2s  
238 substrate SA (Figure 1). ILA was previously identified as substrate of UGT76B1, however, it was not  
239 identified as a molecular marker of infection with *Pseudomonas* in our non-targeted metabolite  
240 fingerprinting approach by UHPLC-HRMS (Supplemental Dataset 1). We observed neither ILA  
241 accumulation in *ugt76b1-1*, nor the respective glucoside in wild type plants after infection. Although there  
242 might be a chance that our workflow is not sufficient to detect these compounds *in vivo*, the intracellular  
243 concentration of ILA in the shoot was quantified to be approximately 2.5 ng per g dry weight and 7 ng per  
244 g dry weight for Col-0 and *ugt76b1-1*, respectively. Estimating a weight loss of at least 1:10 (*m/m*) between

245 dry and f.w., the presented amounts of NHP are a multiple of ILA amounts in the shoot. Considering the  
246 determined  $K_M$  value of UGT76B1 for NHP in comparison with the one towards ILA presented earlier  
247 ( $472\pm 97 \mu\text{M}$ ) we consider ILA of minor importance for the observed enhanced resistance phenotype  
248 (Maksym et al., 2018). Most likely the enhanced resistance phenotype of *ugt76b1-1* is therefore due to  
249 increased accumulation of NHP and SA.

250 The similar  $K_M$ -values for NHP and SA suggest that UGT76B1 has a similar substrate specificity  
251 towards these two molecules. Additionally, the  $K_M$ -value for SA determined in this work is similar to earlier  
252 reports (Noutoshi et al., 2012; Maksym et al., 2018). Nevertheless, NHP and SA differ in their absolute  
253 amount in infected leaf material (Figure 2a and 2b) to several orders of magnitude, suggesting that NHP is  
254 the more accessible, therefore, preferred substrate of UGT76B1. Although amino acid sequence comparison  
255 of UGT74F1 and UGT74F2 with UGT76B1 revealed only 26.96 % and 26.75 % sequence identity  
256 respectively, two critical residues for glycosylation (His20 and Asp109) in the putative active site are  
257 conserved among these UGTs (Figure S5) (George Thompson et al., 2017). Interestingly, we were not able  
258 to detect glycosylation of 4-OH-BA by UGT76B1 neither at the hydroxyl group nor at the carboxyl group.  
259 This suggests that a hydroxyl group in *ortho* or *meta* configuration adjacent to the carboxyl function is  
260 important for optimal binding of the ligand in the active side of UGT76B1.

261 From our transport experiments with D<sub>9</sub>-NHP, we conclude that NHP is not only a mobile signal,  
262 but can translocate from the apoplast to the cytosol and, rather than NHP-OGlc, is required for the  
263 establishment of SAR. This may be supported by an earlier study in which SAG was infiltrated into tobacco  
264 leaves (Hennig et al., 1993). Here, the authors showed that SAG was hydrolyzed in the apoplast to SA and  
265 that rather SA than SAG entered the cell. In addition, other studies support our notion that both NHP and  
266 SA are mobile between local and systemic tissue in *Arabidopsis* and tobacco (Yalpani et al., 1991; Chen et  
267 al., 2018; Lim et al., 2020). Nevertheless, it is still a matter of debate, as there was also evidence presented  
268 that SA is not the mobile signal for SAR (Vernooij et al., 1994b; Vernooij et al., 1994a). However, the  
269 formation of SAG and NHP-OGlc probably have a central role in inactivating SA and NHP as biological  
270 active molecules, as the dwarf phenotype of the corresponding mutant suggests (Figure 3c) (Noutoshi et al.,  
271 2012).

272 Based on the available data, we propose the following pathway for NHP-OGlc biosynthesis in  
273 Figure 8. First ALD1 converts L-lysine to P2C, which is then converted by SARD4 to Pip. Next, Pip is  
274 hydroxylated by FMO1 to NHP. In the last step, NHP is glycosylated by UGT76B1 to form NHP-OGlc.  
275 Together our data extend the NHP metabolic pathway down to NHP-OGlc and illustrates the major  
276 importance of UGT76B1 in metabolic regulation keeping defense and growth in balance.

## 277 **Material and Methods**

## 278 **Plant material and growth conditions**

279 Plants used for this work are all in *A. thaliana* Col-0 ecotype background. The *fmo1-1* and *ugt76b1-1*  
280 (SAIL\_1171\_A11) T-DNA insertion lines were obtained from NASC (University of Nottingham) and they  
281 were described previously. *ugt76b1-3* and *ugt76b1-4* are independent *ugt76b1-1* deletion lines generated by  
282 CRISPR-Cas9 in Col-0 background, with original lab code as CRISPR UGT #5 and #17 respectively.  
283 Double mutant lines *fmo1-1 ugt76b1-40* and *fmo1-1 ugt76b1-104* were generated by crossing *ugt76b1-1*  
284 with *fmo1-1*. In addition, a CRISPR deletion line of *UGT76B1* was generated in *fmo1-1* background and  
285 referred to as *fmo1-1 ugt76b1-5*. The overexpression mutant *FMO1-3D* was described previously (Koch et  
286 al., 2006). Plants were grown for 4-6 weeks under short day conditions (8 hours light/18 hours dark cycle)  
287 with 100-120  $\mu\text{mol}/\text{m}^2$  per s of light intensity at 80 % relative humidity unless specified.

## 288 **Construction of plasmids for *UGT76b1* gene editing and generation of deletion mutants**

289 Three deletion lines *ugt76b1-3*, *ugt76b1-4* and *ugt76b1-5 fmo1-1* (original lab code CRISPR UGT #5,  
290 CRISPR UGT #17 and CRISPR UGT in *fmo1* #1) were generated by CRISPR/Cas9 system as described  
291 (Xing et al., 2014). Two single guide RNAs were designed to target *UGT76B1* genomic DNA to generate a  
292 ~1,000 bp deletion. The PCR fragment containing the guide RNA sequences were amplified from the pCBC-  
293 DT1T2 vector with primers 3G11340-BsFF0 and 3G11340-BsRR0 and subsequently inserted into the  
294 pHEE401 vector using the BsaI site. The derived plasmid was transformed into *E. coli* and later  
295 *Agrobacterium* by electroporation. Col-0 and *fmo1-1* plants were transformed with the *Agrobacterium*  
296 carrying the plasmid by floral dipping. T<sub>1</sub> plants were screened for deletion mutants by PCR with primers  
297 listed in Table S1. Homologous deletion mutants were obtained in T<sub>2</sub> generation.

## 298 **Elicitation of defense response by UV-C and *P.s.m.* ES4326**

299 Plants were treated for 20 min with UV-C radiation in a sterile bench (Telstar Bio-II-A, Azbil Telstar  
300 Technologies, Barcelona, Spain). The sterile bench was pretreated for additional 20 min prior to radiating  
301 the plants. Untreated control plants and the UV-C-treated plants were harvested 24 hours later. Infection of  
302 plants was conducted by infiltrating plant leaves with *P.s.m.* ES4326 at OD<sub>600</sub> = 0.05 in 10 mM MgCl<sub>2</sub>, if  
303 not state otherwise, to induce defense. The bacteria were grown in LB medium with Rifampicin (50  $\mu\text{g}/\mu\text{l}$ ).  
304 In the D<sub>9</sub>-NHP tracking experiment, 82  $\mu\text{g}/\text{ml}$  of chemically synthesized D<sub>9</sub>-NHP was added to the  
305 infiltration solution.

## 306 **Metabolite extraction**

307 Leaves were harvested 24 hours post infection and frozen in liquid nitrogen. The samples were ground under  
308 liquid nitrogen using Retsch 200 MM (Retsch, Haan, Germany). Ground material was weighed and  
309 extracted after a modified methyl-*tert*-butyl ether (MTBE) extraction (Feussner and Feussner, 2019). When

310 metabolite quantification was desired, deuterium labeled D<sub>9</sub>-NHP, D<sub>6</sub>-SA and isotopically labeled <sup>13</sup>C-SAG  
311 was added prior to extraction. The labeled compound serve as reference throughout the analysis in  
312 quantitative matter.

### 313 **UPLC-nanoESI-QTRAP-MS-based metabolite quantification**

314 Absolute quantification of NHP, NHP-OGlc, SA and SAG was performed corresponding to a method  
315 previously described (Herrfurth and Feussner, 2020), including the addition of 50 ng D<sub>9</sub>-NHP (kindly  
316 provided by Prof. Ulf Diederichsen, Goettingen, Germany), 10 ng D<sub>4</sub>-SA (C/D/N Isotopes Inc., Pointe-  
317 Claire, Canada) and 50 ng <sup>13</sup>C<sub>6</sub>-SAG (kindly provided by Prof. Petr Karlovsky, Goettingen, Germany).  
318 Multiple reaction monitoring (MRM) transitions analyzed are shown in supplementary table 2. D<sub>9</sub>-NHP was  
319 synthesized as described previously (Hartmann et al., 2018). Synthesized NHP was characterized via tandem  
320 MS (MS/MS) fragmentation (Rekhter et al., 2019a). The fragmentation behavior underlying the MRM  
321 transitions of NHP-OGlc were analyzed after thin layer chromatographically purification of enzymatically  
322 produced NHP-OGlc using UGT76B1. As stationary phase a TLC silica gel 60(Merck KGaA, Darmstadt,  
323 Germany) was used in combination with butanol:water:acetic acid (4:1:1, v/v/v) as solvent system (Song,  
324 2006). Purified NHP-OGlc was extracted from the silica gel with MTBE corresponding to the extraction  
325 procedure as described (Herrfurth and Feussner, 2020). Successful purification of enzymatically produced  
326 NHP-OGlc was checked via non-targeted UHPLC-HRMS. The quantification of the purified NHP-OGlc  
327 was performed by direct infusion-MS with respect to SAG (kindly provided by Prof. Petr Karlovsky,  
328 Goettingen, Germany).

### 329 **UHPLC-HRMS-based metabolite fingerprint analysis**

330 Metabolites were extracted from 100 mg leaf material by two-phase extraction with MTBE, methanol and  
331 water according to Feussner and Feussner, 2019. Metabolite fingerprint analysis of the metabolites of the  
332 polar extraction phase was performed with the UHPLC1290 Infinity (Agilent Technologies) coupled to a  
333 HRMS instrument (6540 UHD Accurate-Mass Q-TOF, Agilent Technologies) with Agilent Dual Jet Stream  
334 Technology as electrospray ionization (ESI) source (Agilent Technologies). For chromatographic separation  
335 an ACQUITY HSS T3 column (2.1 × 100 mm, 1.8 μm particle size, Waters Corporation) was used with a  
336 flow rate of 500 μl/min at 40 °C. The solvent systems A (water, 0.1 % (v/v) formic acid) and B (acetonitrile,  
337 0.1 % (v/v) formic acid) were used for the following gradient elution: 0 to 3 min: 1 % to 20 % B; 3 to 8 min:  
338 20 % to 97 % B; 8 to 12 min: 100 % B; 12 to 15 min: 1 % B. The QTOF MS instrument was used in a range  
339 from *m/z* 50 to *m/z* 1700 with a detection frequency of 4 GHz, a capillary voltage of 3000 V, nozzle and  
340 fragmentor voltage of 200 V as well as 100 V, respectively. The sheath gas was set to 300 °C, and gas to  
341 250 °C. The gas flow of drying gas was set to 8 l/min and sheath gas to 8 l/min, respectively. Data were  
342 acquired with Mass Hunter Acquisition B.03.01 (Agilent Technologies) in positive as well as ESI mode.

343 For data deconvolution the software Profinder B.08.02 (Agilent Technologies) was used. For further data  
344 processing, statistics, data mining and visualization the tools of the MarVis-Suite (Kaefer et al. 2015,  
345 <http://marvis.gobics.de/>) was applied. Overall, 448 metabolite features (307 features from positive and 141  
346 features from negative ESI mode) with a FDR < 0.005 were selected and clustered by means of one-  
347 dimensional self-organizing maps. The accurate mass information the metabolite features was used for  
348 metabolite annotation (KEGG, <http://www.kegg.jp> and BioCyc, <http://biocyc.org>, in-house database). The  
349 chemical structure of the indicated metabolites were confirmed by HRMS<sup>2</sup> analyses (NHP: [M+H]<sup>+</sup>  
350 146.080, 128.070, 110.06, 100.076, 82.065, 70.065, 55.055 (Rekhter et al., 2019b); NHP-OGlc: [M+H]<sup>+</sup>  
351 308.132, 146.081, 128.0705, 110.06, 100.076, 82.062, 70.065, 55.055 (Rekhter et al., 2019b); SA: [M-H]<sup>-</sup>  
352 137.025, 93.035 (METLIN (<https://metlin.scripps.edu/>), MID3263); SAG: [M-H]<sup>-</sup> 299.0719, 137.024,  
353 93.035; Pip: [M+H]<sup>+</sup> 130.086, 84.081, 70.065, 56.050 (Ding et al., 2016); 2HNG: [M-H]<sup>-</sup> 216.051, 172.062,  
354 128.072, 86.025 (Rekhter et al., 2019b) and SGE: [M-H]<sup>-</sup> 299.078, 137.024, 93.035). The results were  
355 confirmed by two independent experiments with three biological replicates each.

### 356 **RNA extraction, Reverse Transcription and Quantitative Real-time PCR**

357 Plants for gene expression assay were grown on soil under long-day (16 h light) condition. Three leaves of  
358 four-week-old plants (~50 mg) were collected for RNA extraction by EZ-10 Spin Column Plant RNA  
359 Miniprep Kit (Bio Basic Canada). RNAs were then reverse transcribed into cDNAs by OneScript Reverse  
360 Transcriptase (Applied Biological Materials Inc.). qPCR was performed with cDNAs using SYBR Premix  
361 Ex Taq™ II (Takara, Japan). For pathogen-induced gene expression assay, plants were grown under short-  
362 day (12h light) condition. Three leaves of four-six weeks old plants were infiltrated with *P.s.m.* ES4326  
363 (OD<sub>600</sub>=0.001). Leaves were harvested 24 hpi and analyzed via the process as above. Primers for qPCR  
364 were listed in Table S1.

### 365 **Heterologous protein expression and purification**

366 His-tagged UGT76B1 was purified via a combination of methods described recently (Maksym et al., 2018;  
367 Haroth et al., 2019). UGT76B1 (*AT3G11340*, GenBank Accession Number Q9C768.1) was amplified from  
368 total cDNA derived from infected leaf tissue and cloned into pET28a vector (Merck, Darmstadt, Germany)  
369 using the BamHI and SalI restriction sites. The plasmid containing the *UGT76B1* gene was transformed into  
370 BL21 Star (DE3) cells (Thermo Fisher Scientific, Waltham, MA, USA) by heat shock. Cell cultures were  
371 grown in auto-induction medium (Studier, 2005) at 16 °C for 4 d. Cell pellets of 1 liter culture were  
372 resuspended in lysis buffer (50 mM Tris/HCl pH= 7.8, lysozyme, DNaseI and 0.1 mM PMSF). After  
373 homogenization, cells were disrupted by ultrasonication. Cleared lysate was obtained by centrifugation at  
374 25000 xg for 45 min. The recombinant protein was purified from the cleared lysate using a combination of

375 metal affinity chromatography using nickel-affinity (GE Healthcare, Chicago, IL, USA) and size exclusion  
376 chromatography using 16/600 Superdex 75 prep grade columns (GE Healthcare, Chicago, IL, USA).

### 377 **LC-MS based activity assay and *in vitro* kinetics**

378 UGT76B1 recombinant protein was incubated with substrates NHP, SA and ILA for 30 min at 30 °C. The  
379 reaction was stopped by the addition of 20 % acetonitrile. Samples were analyzed using a 1290 Infinity  
380 UHPLC system coupled to a 6540 UHD Accurate-Mass Q-TOF (Agilent Technologies, USA) as previously  
381 described (Feussner and Feussner, 2019). Kinetic parameters of UGT76B1's substrates NHP, SA and ILA  
382 were analyzed via UHPLC-HRMS. The reaction mixture contained 3.5 µg UGT76B1, 2 mM UDP-Glc  
383 (Merck KGaA) and 0-2.5 mM substrate. Before the incubation with UGT76B1, the initial amount of  
384 substrate was determined for analysis of substrate reduction. The reaction was incubated for 15 min at 30 °C  
385 and stopped by the addition of MeOH. The difference in signal intensity of substrate was plotted for each  
386 substrate and concentration. The Michaelis-Menten constant  $K_M$  was determined via Hill regression analysis  
387 using OriginPro8.5 (OriginLab Corporation, Northampton, MA, USA).

### 388 **Pathogen infection assay and SAR assay**

389 Basal resistance against *H.a. Noco 2* was tested by spay-inoculating two-week-old seedlings with spore  
390 solution (50,000 spores/mL). Inoculated seedlings were covered by a transparent lid and grown in a plant  
391 chamber with a relative humidity of ~80 %. Infection was scored 7 dpi by counting conidia spores with a  
392 hemocytometer.

393 Induction of SAR against *H.a. Noco 2* was performed by infiltrating two full-grown leaves of three-week-  
394 old plants with *P.s.m.* ES4326 (OD<sub>600</sub> = 0.001) or 10 mM MgCl<sub>2</sub> (mock). Two days later, plants were  
395 sprayed with *H.a. Noco 2* spore solution (50,000 spores/mL). Infection on distal leaves were scored 7 dpi  
396 as described previously (Ding et al., 2016).

397 Induction of SAR against *Pseudomonas* was tested by infiltrating *P.s.m.* ES4326 (OD<sub>600</sub> = 0.001) or 10 mM  
398 MgCl<sub>2</sub> (mock) on two leaves of four-week-old plants grown under short-day condition. Two days later, two  
399 distal leaves were challenged with *P.s.m.* ES4326 (OD<sub>600</sub> = 0.001). Infection was scored both 0 dpi and 3  
400 dpi by measuring the bacterial titer in the distal leaves.

### 401 **Structural prediction and ligand docking**

402 The crystal structure of UGT74F2 (George Thompson et al., 2017), co-crystalized with SA-analogue 2-  
403 bromobenzoic acid, UDP, 3-*O*-β-D-glucopyranosyl-β-D-glucopyranose and β-D-glucose (PDB ID 5V2J)  
404 was used for structural prediction of UGT76B1. The structural prediction of UGT76B1 was done by  
405 PHYR2Protein (Kelley et al., 2015). NHP was fit into the electron density of SA-analogue 2-bromobenzoic

406 acid using Coot (Emsley and Cowtan, 2004). Figures were created and distances were measured using  
407 PyMol (Schrödinger LLC, USA).

#### 408 **Statistical analysis**

409 Statistical analysis were performed using Origin Pro8.5 (OriginLab Corporation, Northampton, MA, USA).

#### 410 **Supplemental Data**

411 **Supplemental Figure 1.** CRISPR deletion mutants of *UGT76B1* are unable to synthesized NHP-OGlc after  
412 UV-treatment.

413 **Supplemental Figure 2.** *fmo1-1 ugt76b1-1* double loss-of-function mutant plants synthesize neither NHP  
414 nor NHP-OGlc after UV-treatment.

415 **Supplemental Figure 3.** Transcripts levels of *PR1* and *PR2* after infection with *P.s.m.* in *ugt76b1* and wild  
416 type.

417 **Supplemental Figure 4.** Purification of UGT76B1 heterologously expressed in *E. coli*.

418 **Supplemental Figure 5.** Modeling of NHP into the SA-analogues electron density in the predicted *in silico*  
419 UGT76B1 model.

420 **Supplemental Figure 6.** Transcripts of *UGT76B1* were not present in the mutant.

421 **Supplemental Table 1.** List of primers used in this work.

422 **Supplemental Table 2.** Multiple reaction monitoring parameters for absolute quantification of analytes.

423 **Supplemental Dataset 1.** Non-targeted metabolite fingerprinting of Col-0, *fmo1-1* and *ugt76b1-1* after  
424 *P.s.m.* infection.

#### 425 **Acknowledgments**

426 We would like to acknowledge Brigitte Worbs for the chemical synthesis of the NHP and D<sub>9</sub>-labeled NHP  
427 standard. We thank Prof. Dr. Petr Karlovsky for kindly providing the SAG standard. LM and DR were  
428 supported by the Goettingen Graduate School for Neurosciences, Biophysics, and Molecular Biosciences  
429 (GGNB) at the Georg August University Goettingen. IF acknowledges funding from the Deutsche  
430 Forschungsgemeinschaft (DFG; GRK 2172-PRoTECT, INST 186/822-1 and ZUK 45/2010). YZ  
431 acknowledges funding from the NSERC Discovery Program. WH was supported by China Scholarship  
432 Council and NSERC-CREATE (PRoTECT).

#### 433 **Author contributions**

434 YZ and IF designed and supervised the study. Experimental research was conducted by LM, DR, WH, KF,  
435 HT and CH. LM, DR, WH, KF, CH, YZ and IF analyzed the data and wrote the manuscript.

## 436 References

- 437 **Bartsch, M., Bednarek, P., Vivancos, P.D., Schneider, B., von Roepenack-Lahaye, E., Foyer, C.H.,**  
438 **Kombrink, E., Scheel, D., and Parker, J.E.** (2010). Accumulation of isochlorogenic acid-derived 2,3-  
439 dihydroxybenzoic 3-O-β-D-xyloside in *Arabidopsis* resistance to pathogens and ageing of leaves. *J.*  
440 *Biol. Chem.* **285**, 25654-25665.
- 441 **Bauer, S., Mekonnen, D.W., Geist, B., Lange, B., Ghirardo, A., Zhang, W., and Schäffner, A.R.** (2020).  
442 The isoleucic acid triad: distinct impacts on plant defense, root growth, and formation of reactive  
443 oxygen species. *J. Exp. Bot.* -, doi: 10.1093/jxb/eraa1160.
- 444 **Bernsdorff, F., Döring, A.-C., Gruner, K., Schuck, S., Bräutigam, A., and Zeier, J.** (2016). Pipecolic  
445 acid orchestrates plant systemic acquired resistance and defense priming via salicylic acid-dependent  
446 and -independent pathways. *Plant Cell* **28**, 102-129.
- 447 **Chen, L., Wang, W.-S., Wang, T., Meng, X.-F., Chen, T.-t., Huang, X.-X., Li, Y.-j., and Hou, B.-K.**  
448 (2019). Methyl Salicylate Glucosylation Regulates Plant Defense Signaling and Systemic Acquired  
449 Resistance. *Plant Physiol.* **180**, 2167–2181.
- 450 **Chen, Y.-C., Holmes, E.C., Rajniak, J., Kim, J.-G., Tang, S., Fischer, C.R., Mudgett, M.B., and**  
451 **Sattely, E.S.** (2018). *N*-hydroxy-pipecolic acid is a mobile metabolite that induces systemic disease  
452 resistance in *Arabidopsis*. *Proc. Natl. Acad. Sci. USA* **115**, E4920-E4929.
- 453 **Dean, J.V., and Delaney, S.P.** (2008). Metabolism of salicylic acid in wild-type, *ugt74f1* and *ugt74f2*  
454 glucosyltransferase mutants of *Arabidopsis thaliana*. *Physiologia Plantarum* **132**, 417-425.
- 455 **Ding, P., Rekhter, D., Ding, Y., Feussner, K., Busta, L., Haroth, S., Xu, S., Li, X., Jetter, R., Feussner,**  
456 **I., and Zhang, Y.** (2016). Characterization of a pipecolic acid biosynthesis pathway required for  
457 systemic acquired resistance. *Plant Cell* **28**, 2603-2615.
- 458 **Emsley, P., and Cowtan, K.** (2004). Coot: model-building tools for molecular graphics. *Acta Crystallogr*  
459 *D Biol Crystallogr* **60**, 2126-2132.
- 460 **Feussner, K., and Feussner, I.** (2019). Comprehensive LC-MS-based metabolite fingerprinting approach  
461 for plant and fungal-derived samples. In *High-Throughput Metabolomics: Methods and Protocols*, A.  
462 D'Alessandro, ed (New York, NY: Springer New York), pp. 167-185.
- 463 **Fu, Z.Q., and Dong, X.** (2013). Systemic acquired resistance: Turning local infection into global defense.  
464 *Annu. Rev. Plant Biol.* **64**, 839-863.
- 465 **George Thompson, A.M., Iancu, C.V., Neet, K.E., Dean, J.V., and Choe, J.Y.** (2017). Differences in  
466 salicylic acid glucose conjugations by UGT74F1 and UGT74F2 from *Arabidopsis thaliana*. *Sci. Rep.*  
467 **7**, 46629.



- 468 **Gruner, K., Griebel, T., Návarová, H., Attaran, E., and Zeier, J.** (2013). Reprogramming of plants  
469 during systemic acquired resistance. *Front. Plant Sci.* **4**, 252.
- 470 **Guerra, T., Schilling, S., Hake, K., Gorzolka, K., Sylvester, F.-P., Conrads, B., Westermann, B., and**  
471 **Romeis, T.** (2020). Calcium-dependent protein kinase 5 links calcium-signaling with *N*-Hydroxy-L-  
472 pipercolic acid- and *SARDI*-dependent immune memory in systemic acquired resistance. *New Phytol.*  
473 **225**, 310-325.
- 474 **Haroth, S., Feussner, K., Kelly, A.A., Zienkiewicz, K., Shaikhqasem, A., Herrfurth, C., and Feussner,**  
475 **I.** (2019). The glycosyltransferase UGT76E1 significantly contributes to 12-*O*-glucopyranosyl-  
476 jasmonic acid formation in wounded *Arabidopsis thaliana* leaves. *J. Biol. Chem.* **294**, 9858-9872.
- 477 **Hartmann, M., and Zeier, J.** (2019). *N*-Hydroxypipercolic acid and salicylic acid: a metabolic duo for  
478 systemic acquired resistance. *Curr. Opin. Plant Biol.* **50**, 44-57.
- 479 **Hartmann, M., Kim, D., Bernsdorff, F., Ajami-Rashidi, Z., Scholten, N., Schreiber, S., Zeier, T.,**  
480 **Schuck, S., Reichel-Deland, V., and Zeier, J.** (2017). Biochemical principles and functional aspects  
481 of pipercolic acid biosynthesis in plant immunity. *Plant Physiol.* **174**, 124-153.
- 482 **Hartmann, M., Zeier, T., Bernsdorff, F., Reichel-Deland, V., Kim, D., Hohmann, M., Scholten, N.,**  
483 **Schuck, S., Bräutigam, A., Hölzel, T., Ganter, C., and Zeier, J.** (2018). Flavin monooxygenase-  
484 generated *N*-hydroxypipercolic acid is a critical element of plant systemic immunity. *Cell* **173**, 456-469.
- 485 **Hennig, J., Malamy, J., Gryniewicz, G., Indulski, J., and Klessing, D.F.** (1993). Interconversion of the  
486 salicylic acid signal and its glucoside in tobacco. *Plant J.* **4**, 593-600.
- 487 **Herrfurth, C., and Feussner, I.** (2020). Quantitative jasmonate profiling using a high-throughput UPLC-  
488 NanoESI-MS/MS method. In *Jasmonate in Plant Biology: Methods and Protocols*, A. Champion and  
489 L. Laplaze, eds (New York, NY: Springer US), pp. 169-187.
- 490 **Holmes, E.C., Chen, Y.-C., Sattely, E.S., and Mudgett, M.B.** (2019). An engineered pathway for *N*-  
491 hydroxy-pipercolic acid synthesis enhances systemic acquired resistance in tomato. *Sci. Signal.* **12**,  
492 eaay3066.
- 493 **Huang, W., Wang, Y., Li, X., and Zhang, Y.** (2020). Biosynthesis and regulation of salicylic acid and *N*-  
494 hydroxypipercolic acid in plant immunity. *Mol. Plant* **13**, 31-41.
- 495 **Huang, X., Zhu, G.-q., Liu, Q., Chen, L., Li, Y.-J., and Hou, B.-K.** (2018). Modulation of plant salicylic  
496 acid-associated immune responses via glycosylation of dihydroxybenzoic acids. *Plant Physiol.* **176**,  
497 3103-3119.
- 498 **Kelley, L.A., Mezulis, S., Yates, C.M., Wass, M.N., and Sternberg, M.J.E.** (2015). The Phyre2 web  
499 portal for protein modeling, prediction and analysis. *Nat. Protoc.* **10**, 845-858.
- 500 **Koch, M., Vorwerk, S., Masur, C., Sharifi-Sirchi, G., Olivieri, N., and Schlaich, N.L.** (2006). A role  
501 for a flavin-containing mono-oxygenase in resistance against microbial pathogens in *Arabidopsis*. *Plant*  
502 *J.* **47**, 629-639.

- 503 **Lim, G.-H., Liu, H., Yu, K., Liu, R., Shine, M.B., Fernandez, J., Burch-Smith, T., Mobley, J.K.,**  
504 **McLetchie, N., Kachroo, A., and Kachroo, P.** (2020). The plant cuticle regulates apoplastic transport  
505 of salicylic acid during systemic acquired resistance. *Sci. Adv.* **6**, eaaz0478.
- 506 **Maksym, R.P., Ghirardo, A., Zhang, W., von Saint Paul, V., Lange, B., Geist, B., Hajirezaei, M.-R.,**  
507 **Schnitzler, J.-P., and Schäffner, A.R.** (2018). The defense-related isoleucic acid differentially  
508 accumulates in *Arabidopsis* among branched-chain amino acid-related 2-hydroxy carboxylic acids.  
509 *Front. Plant Sci.* **9**, 766.
- 510 **Navarova, H., Bernsdorff, F., Döring, A.-C., and Zeier, J.** (2012). Pipecolic acid, an endogenous  
511 mediator of defense amplification and priming, is a critical regulator of inducible plant immunity. *Plant*  
512 *Cell* **24**, 5123-5141.
- 513 **Noutoshi, Y., Okazaki, M., Kida, T., Nishina, Y., Morishita, Y., Ogawa, T., Suzuki, H., Shibata, D.,**  
514 **Jikumaru, Y., Hanada, A., Kamiya, Y., and Shirasu, K.** (2012). Novel plant immune-priming  
515 compounds identified via high-throughput chemical screening target salicylic acid glucosyltransferases  
516 in *Arabidopsis*. *Plant Cell* **24**, 3795-3804.
- 517 **Rekhter, D., Mohnike, L., Feussner, K., Zienkiewicz, K., Zhang, Y., and Feussner, I.** (2019a). Enhanced  
518 Disease Susceptibility 5 (EDS5) is required for *N*-hydroxy pipecolic acid formation. *bioRxiv*, 630723.
- 519 **Rekhter, D., Lüdke, D., Ding, Y., Feussner, K., Zienkiewicz, K., Lipka, V., Wiermer, M., Zhang, Y.,**  
520 **and Feussner, I.** (2019b). Isochorismate-derived biosynthesis of the plant stress hormone salicylic  
521 acid. *Science* **365**, 498-502.
- 522 **Seo, S., Ishizuka, K., and Ohashi, Y.** (1995). Induction of salicylic acid beta-glucosidase in tobacco leaves  
523 by exogenous salicylic acid. *Plant Cell Physiol.* **36**, 447-453.
- 524 **Song, J.T.** (2006). Induction of a salicylic acid glucosyltransferase, AtSGT1, is an early disease response  
525 in *Arabidopsis thaliana*. *Molecules and Cells* **22**, 233-238.
- 526 **Song, J.T., Lu, H., McDowell, J.M., and Greenberg, J.T.** (2004). A key role for ALD1 in activation of  
527 local and systemic defenses in *Arabidopsis*. *Plant J.* **40**, 200-212.
- 528 **Song, J.T., Koo, Y.J., Seo, H.S., Kim, M.C., Choi, Y.D., and Kim, J.H.** (2008). Overexpression of  
529 AtSGT1, an *Arabidopsis* salicylic acid glucosyltransferase, leads to increased susceptibility to  
530 *Pseudomonas syringae* *Phytochemistry* **69**, 1128–1134.
- 531 **Song, J.T., Koo, Y.J., Park, J.-B., Cho, Y.J., Seo, H.S., and Choi, Y.D.** (2009). The expression patterns  
532 of *AtBSMT1* and *AtSAGT1* encoding a salicylic acid (SA) methyltransferase and a SA  
533 glucosyltransferase, respectively, in *Arabidopsis* plants with altered defense responses. *Molecules and*  
534 *Cells* **28**, 105-109.
- 535 **Torrens-Spence, M.P., Bobokalonova, A., Carballo, V., Glinkerman, C.M., Pluskal, T., Shen, A., and**  
536 **Weng, J.-K.** (2019). PBS3 and EPS1 complete salicylic acid biosynthesis from isochorismate in  
537 *Arabidopsis*. *Mol. Plant* **12**, 1577-1586.

- 538 **Vernooij, B., Uknes, S., Ward, E., and Ryals, J.** (1994a). Salicylic acid as a signal molecule in plant-  
539 pathogen interactions. *Current Opinion in Cell Biology* **6**, 275-279.
- 540 **Vernooij, B., Friedrich, L., Morse, A., Reist, R., Kolditz-Jawhar, R., Ward, E., Uknes, S., Kessmann,**  
541 **H., and Ryals, J.** (1994b). Salicylic Acid Is Not the Translocated Signal Responsible for Inducing  
542 Systemic Acquired Resistance but Is Required in Signal Transduction. *Plant Cell* **6**, 959-965.
- 543 **Vogel-Adghough, D., Stahl, E., Návarová, H., and Zeier, J.** (2013). Pipecolic acid enhances resistance to  
544 bacterial infection and primes salicylic acid and nicotine accumulation in tobacco. *Plant Signaling &*  
545 *Behavior* **8**, e26366.
- 546 **von Saint Paul, V., Zhang, W., Kanawati, B., Geist, B., Faus-Kessler, T., Schmitt-Kopplin, P., and**  
547 **Schäffner, A.R.** (2011). The *Arabidopsis* glucosyltransferase UGT76B1 conjugates isoleucic acid and  
548 modulates plant defense and senescence. *Plant Cell* **23**, 4124-4145.
- 549 **Wildermuth, M.C., Dewdney, J., Wu, G., and Ausubel, F.M.** (2001). Isochorismate synthase is required  
550 to synthesize salicylic acid for plant defence. *Nature* **414**, 562-565.
- 551 **Xing, H.-L., Dong, L., Wang, Z.-P., Zhang, H.-Y., Han, C.-Y., Liu, B., Wang, X.-C., and Chen, Q.-J.**  
552 (2014). A CRISPR/Cas9 toolkit for multiplex genome editing in plants. *BMC Plant Biol.* **14**, 327.
- 553 **Yalpani, N., Leon, J., Lawton, M.A., and Raskin, I.** (1993). Pathway of Salicylic Acid Biosynthesis in  
554 Healthy and Virus-Inoculated Tobacco. *Plant Physiol.* **103**, 315-321.
- 555 **Yalpani, N., Enyedi, A.J., León, J., and Raskin, I.** (1994). Ultraviolet light and ozone stimulate  
556 accumulation of salicylic acid, pathogenesis-related proteins and virus resistance in tobacco. *Planta*  
557 **193**, 372-376.
- 558 **Yalpani, N., Silverman, P., Wilson, T.M., Kleier, D.A., and Raskin, I.** (1991). Salicylic acid is a systemic  
559 signal and an inducer of pathogenesis-related proteins in virus-infected tobacco. *Plant Cell* **3**, 809-818.
- 560 **Zhang, Y., and Li, X.** (2019). Salicylic acid: biosynthesis, perception, and contributions to plant immunity.  
561 *Curr. Opin. Plant Biol.* **50**, 29-36.
- 562 **Zhang, Y., Yang, Y., Fang, B., Gannon, P., Ding, P., Li, X., and Zhang, Y.** (2010). *Arabidopsis snz2-*  
563 *ID* activates receptor-like protein-mediated immunity transduced through WRKY70. *Plant Cell* **22**,  
564 3153-3163.
- 565 **Zhang, Y., Zhao, L., Zhao, J., Li, Y., Wang, J., Guo, R., Gan, S., Liu, C.-J., and Zhang, K.** (2017).  
566 *S5H/DMR6* encodes a salicylic acid 5-hydroxylase that fine-tunes salicylic acid homeostasis. *Plant*  
567 *Physiol.* **175**, 1082-1093.
- 568

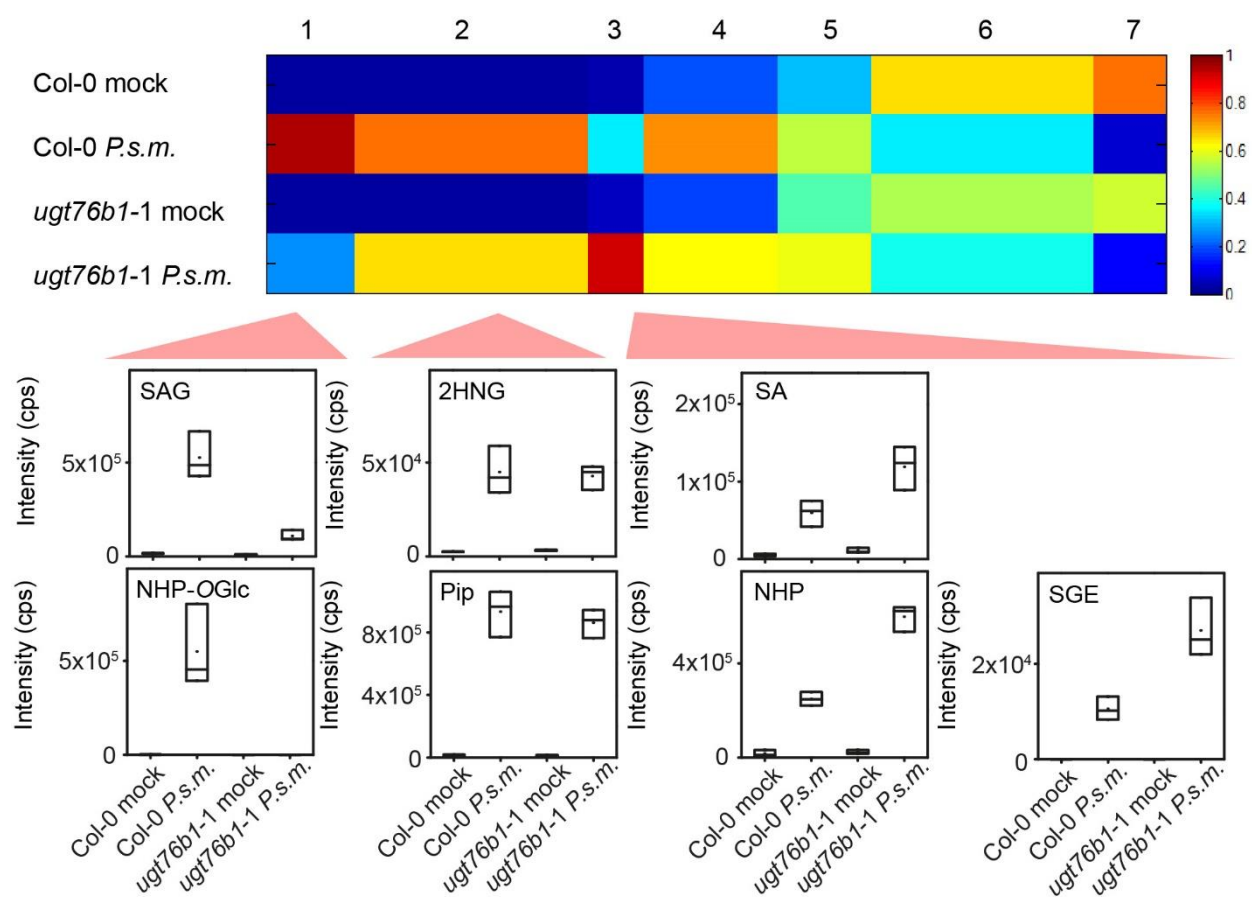

Figure 1. **Non-targeted metabolomics revealed NHP as substrate of UGT76B1 *in vivo*.** Col-0 and *ugt76b1-1* mutant plants were infiltrated with MgCl<sub>2</sub> (mock) or *Pseudomonas* ES4326 (*P.s.m.*) at OD<sub>600</sub>=0.05. Samples were collected 24 hours post infection. Metabolites of the polar extraction phase were analyzed by a metabolite fingerprinting approach based on UHPLC-HRMS. Intensity-based clustering by means of one-dimensional self-organizing maps of 448 metabolite features (FDR < 0.005) in 7 clusters is shown. The heat map colors represent average intensity values according to the color map on the right-hand side. The width of each cluster is proportional to the number of features assigned to this cluster. Box plots for selected metabolites of the indicated clusters are shown. The identity of the metabolites was unequivocally confirmed by UHPLC-HRMSMS analyses. The results were confirmed by two independent experiments. Data represents n=3 biological replicates.

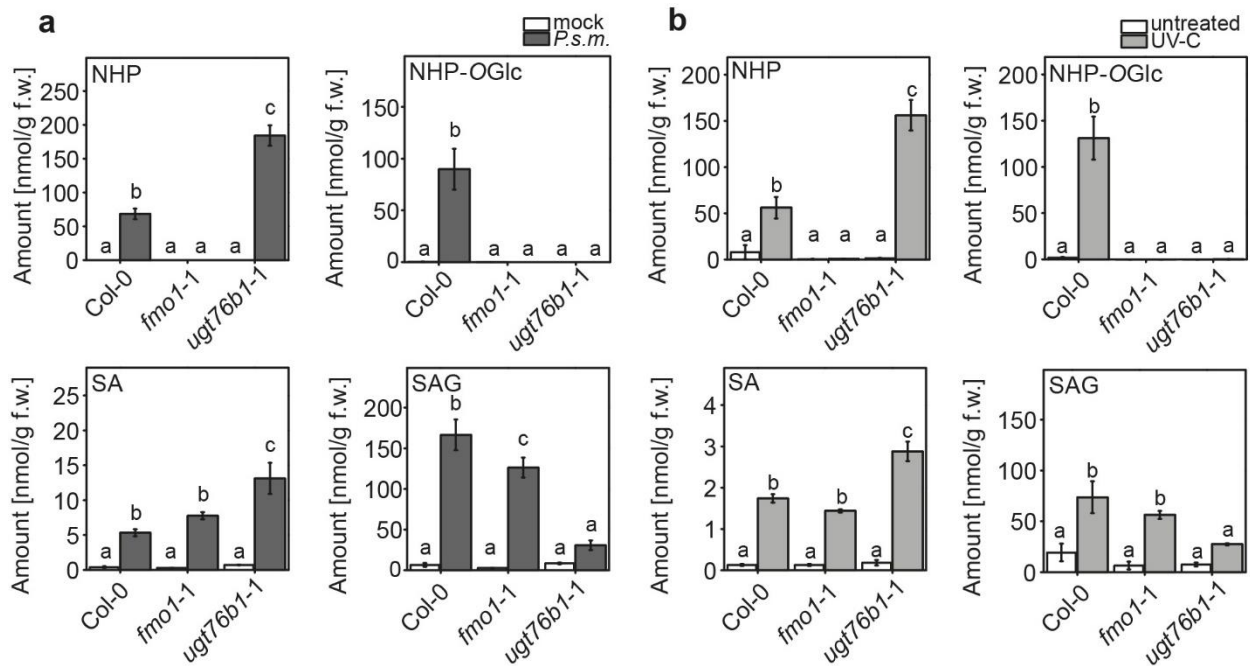

**Figure 2. *UGT76B1* loss-of-function mutant plants are unable to synthesize NHP-OGlc.** Amounts of *N*-hydroxy-pipecolic acid (NHP), NHP-glycoside (NHP-OGlc), salicylic acid (SA) and SA-glycoside (SAG) in wild type (Col-0), *fmo1-1* and *ugt76b1-1* plants after infection with *P.s.m.* ES4326 (**a**) or UV treatment (**b**). Three leaves of 6-week-old plants, grown under short day conditions (8 hours light period), were infiltrated with *P.s.m.* ES4326 at  $OD_{600} = 0.05$  in 10 mM  $MgCl_2$  (*P.s.m.*) or 10 mM  $MgCl_2$  (mock). 24 hours post infiltration leaves were harvested and analyzed using UPLC-nanoESI-QTRAP-MS. Plants grown under long day conditions (16 h light period) were treated for 20 min with UV-C. 24 hours post UV-C treatment leaves were harvested and analyzed using UPLC-nanoESI-QTRAP-MS. Data represents the amount of analyte in nmol/g fresh weight (f.w.). Letters indicate statistical differences ( $p < 0.05$ , one-way ANOVA;  $n=3$  biological replicates). The experiment was repeated once with similar results.

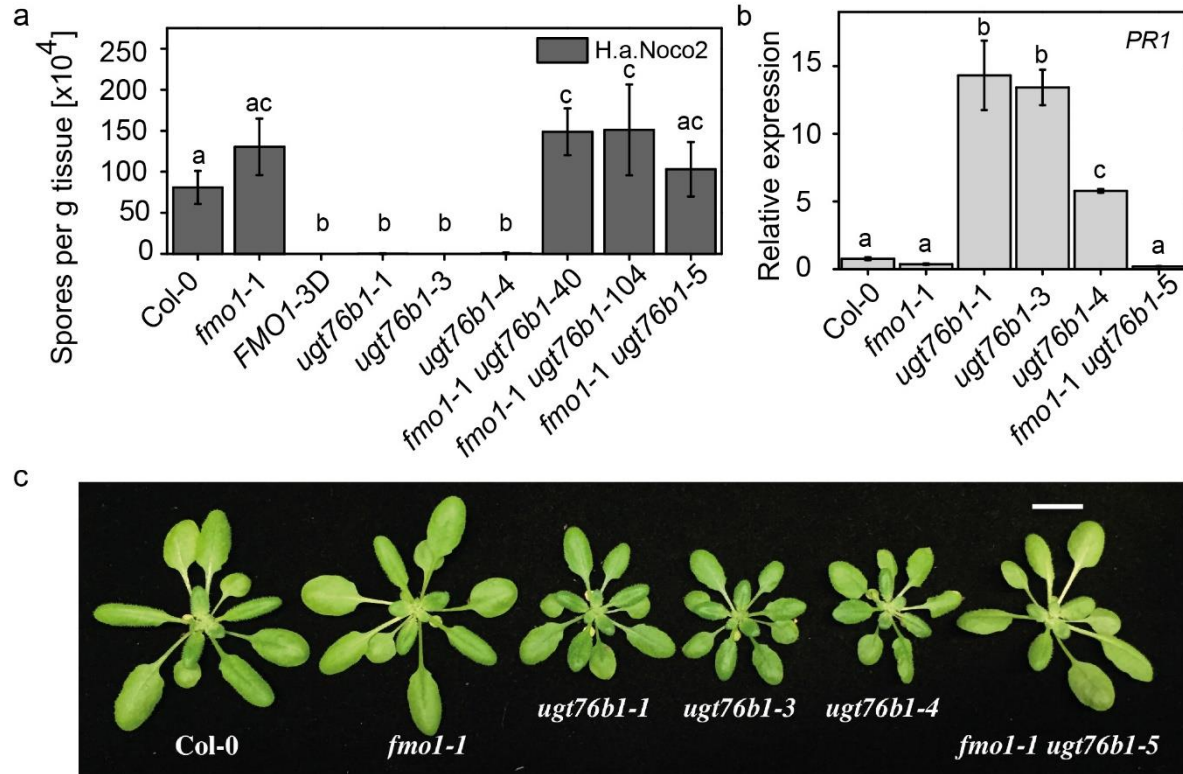

**Figure 3. Rescue of *ugt76b1* mutant phenotypes by introduction of the *fmo1-1* mutation.** (a) Growth of *H. a. Noco2* on wild type (Col-0), *fmo1-1*, FMO1-3D, *ugt76b1-1*, *ugt76b1-3*, *ugt76b1-4*, *fmo1-1 ugt76b1-40*, *fmo1-1 ugt76b1-104* and *fmo1-1 ugt76b1-5* plants. Two-week-old seedlings were sprayed with *H. a. Noco2* spore suspension ( $5 \times 10^4$  spores/mL). Infection was scored 7 days after infection. Letters indicate statistical differences ( $p < 0.05$ , one-way ANOVA;  $n=4$  biological replicates). (b) Basal *PR1* gene expression in four-week-old plants of the indicated genotypes determined via quantitative RT-PCR. Letters indicate statistical differences ( $p < 0.05$ , one-way ANOVA;  $n=3$  biological replicates). (c) Growth phenotypes of Col-0, *fmo1-1*, *ugt76b1-1*, *ugt76b1-3*, *ugt76b1-4* and *fmo1-1 ugt76b1-5*. The Photo was taken on four-week-old plants grown under long day conditions (16 hours light/8 hours dark cycle). Scale bar is 1 cm.

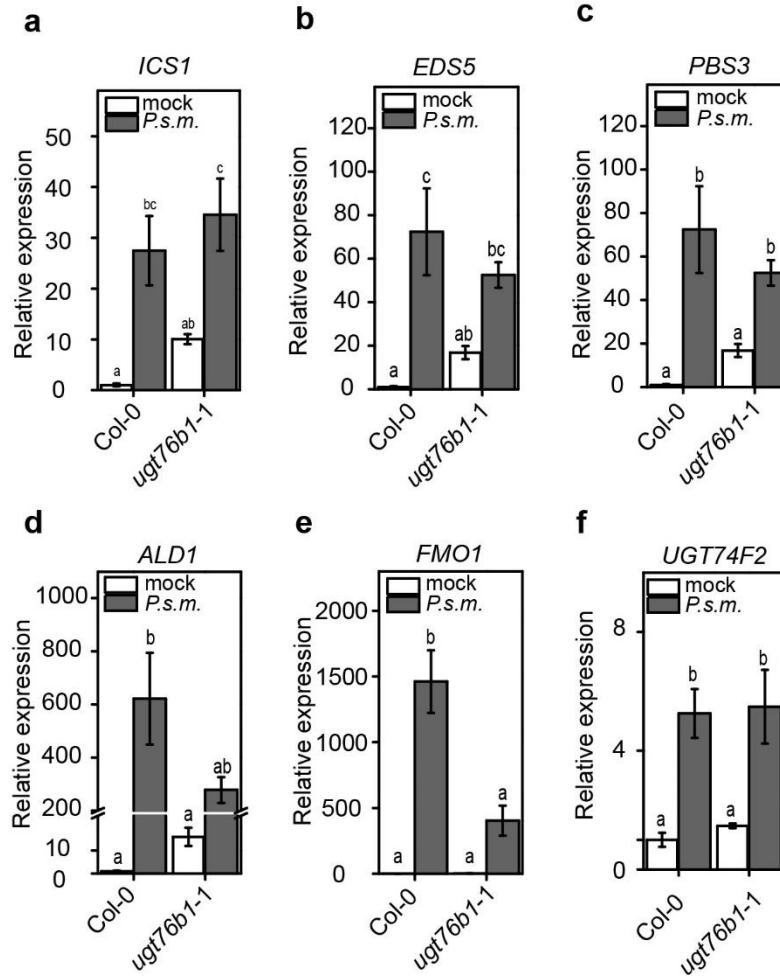

Figure 4. Comparisons between transcript levels of *ICS1*, *EDS5*, *PBS3*, *ALD1*, *FMO1* and *UGT74F2* in *ugt76b1* and wild type. Transcript abundance of genes encoding SA and NHP biosynthetic enzymes was analyzed in wild type and *ugt76b1-1* plants after infection with *P.s.m.* ES4326. Three leaves of 4-6 week-old plants were treated with *P.s.m.* ES4326 ( $OD_{600}=0.001$ ). Leaves were harvested 24 hours post infection and analyzed via quantitative PCR using cDNA generated by reverse-transcriptase reaction as templates. Letters indicate statistical differences ( $p < 0.05$ , one-way ANOVA;  $n=3$  biological replicates). Graph **d** includes an axis break from 25 to 200.

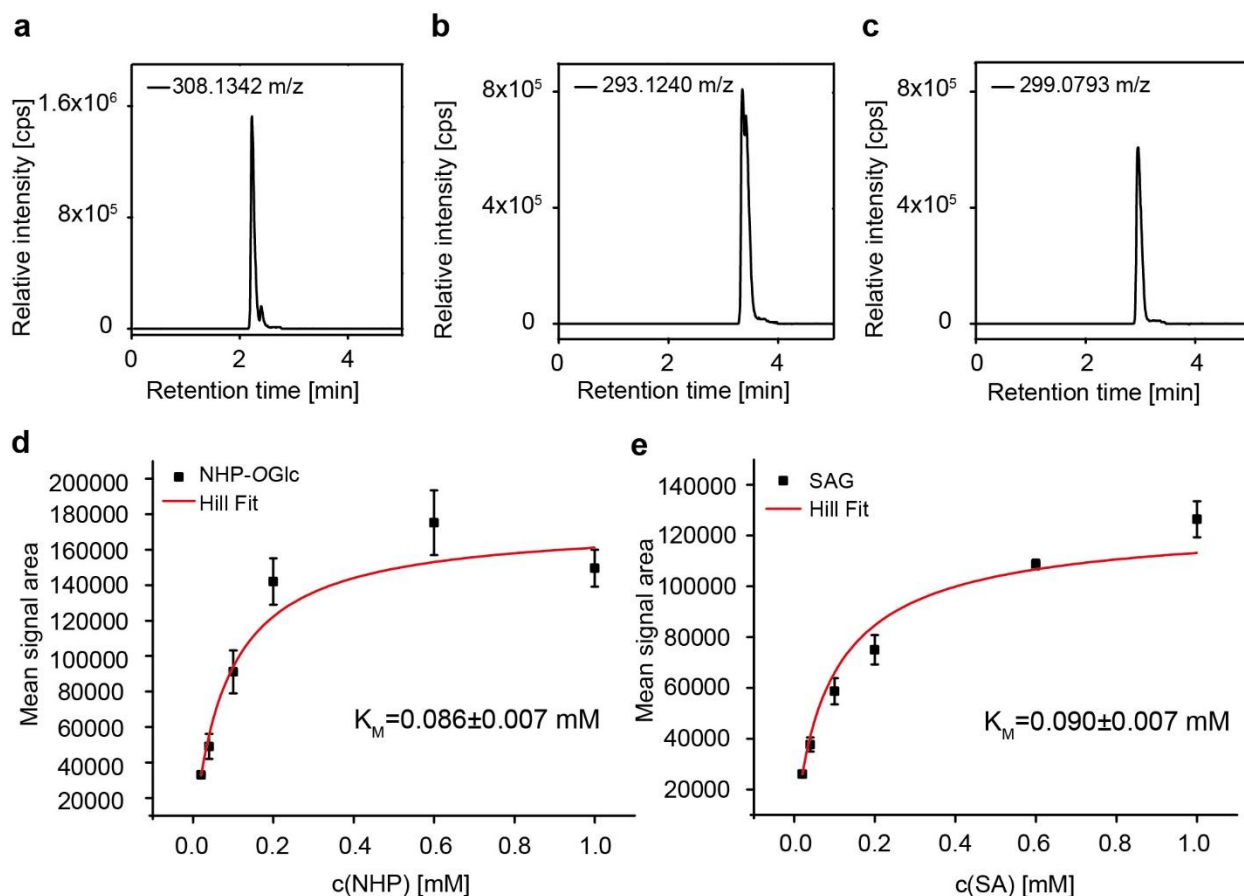

Figure 5. **Glycosylation of SA, ILA and NHP by UGT76B1 *in vitro*.** Activity assays were carried out using NHP, ILA and SA as substrates for the recombinant UGT76B1. Extracted ion chromatograms of the reaction products (a) NHP-OGlc ( $m/z$  308.1342), (b) isoleucic acid-glycoside (ILA-Glc) ( $m/z$  293.1240) and (c) SAG ( $m/z$  299.0793) are shown. 10  $\mu$ g of recombinant UGT76B1 were incubated with 50  $\mu$ M substrate and 500  $\mu$ M UDP-Glc at 30  $^{\circ}$ C for 30 min. The reaction was stopped by adding 25 % ( $v/v$ ) acetonitrile. Michaelis-Menten constants ( $K_M$ ) of UGT76B1 were determined for the substrate NHP (Coefficient of determination ( $R^2$ )=0.974) (d) and SA ( $R^2$ =0.993) (e), respectively. Mean signal area of the respective products (NHP-OGlc or SAG) from three replicates at different substrate concentrations are shown. Non-linear Hill regression was performed with Origin Pro 8.5 (OriginLab Corporation, Northhampton, MA, USA). All samples were measured via UHPLC-HRMS-analysis. Data are representative for two independent experiments.



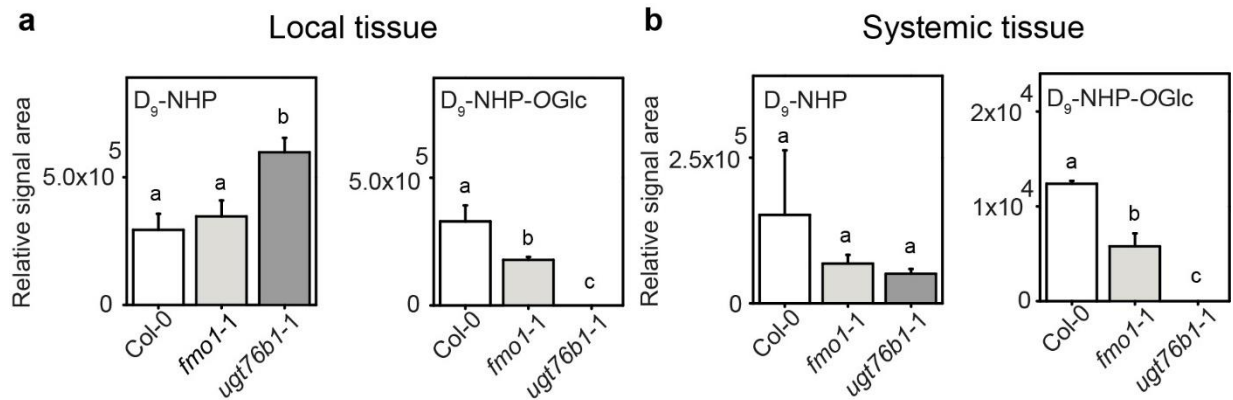

Figure 6. **Infiltrated D<sub>9</sub>-NHP moves systemically and is converted to D<sub>9</sub>-NHP-OGlc in wild type and *fmo1-1* but not in *ugt76b1-1* plants.** Relative intensities of deuterated NHP (D<sub>9</sub>-NHP) and its glucoside D<sub>9</sub>-NHP-OGlc were analyzed 24 hours after infiltration of D<sub>9</sub>-NHP to local tissue. Local and systemic leaves were harvested and analyzed by UHPLC-HRMS. Letters indicate statistical differences (p < 0.05, one-way ANOVA; n=3 biological replicates). The experiment was repeated once with similar results.

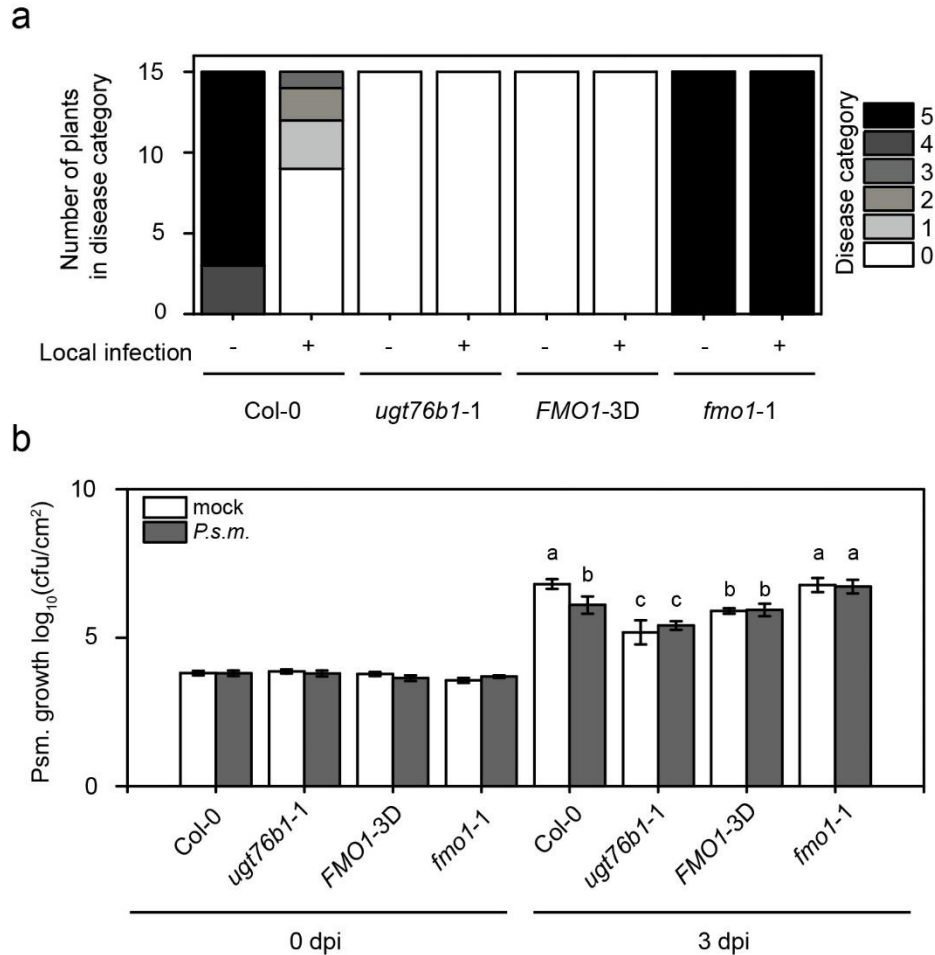

Figure 7. **Growth of *H.a. Noco2* and *P.s.m.* on the distal leaves of wild type (Col-0), *ugt76b1-1*, *FMO1-3D* and *fmo1-1*.** Three-week-old plants were first infiltrated with *P.s.m.* ES4326 ( $OD_{600} = 0.001$ ) or 10 mM  $MgCl_2$  (mock) on two primary leaves and sprayed with *H. a. Noco 2* spores ( $5 \times 10^4$  spores/mL) 2 days later. Infections on systemic leaves were scored 7 days after inoculation as described previously (Zhang et al., 2010). A total of 15 plants were scored for each treatment. Disease rating scores are as follows: 0, no conidiophores on the plants; 1, one leaf was infected with no more than five conidiophores; 2, one leaf was infected with more than five conidiophores; 3, two leaves were infected but no more than five conidiophores on each infected leaf; 4, two leaves were infected with more than five conidiophores on each infected leaf; 5, more than two leaves were infected with more than five conidiophores. Similar results were obtained in three independent experiments (a). Four-week-old plants were first infiltrated with *P.s.m.* ES4326 ( $OD_{600} = 0.001$ ) or 10 mM  $MgCl_2$  (mock) on two primary leaves. Two days later, two upper leaves were challenged with *P.s.m.* ES4326 ( $OD_{600} = 0.001$ ). Infections on systemic leaves were scored directly after (0 dpi) and three days post inoculation (3 dpi). Letters indicate statistical differences ( $p < 0.05$ , one-way ANOVA;  $n=6-8$  biological replicates). Similar results were obtained in three independent experiments (b).

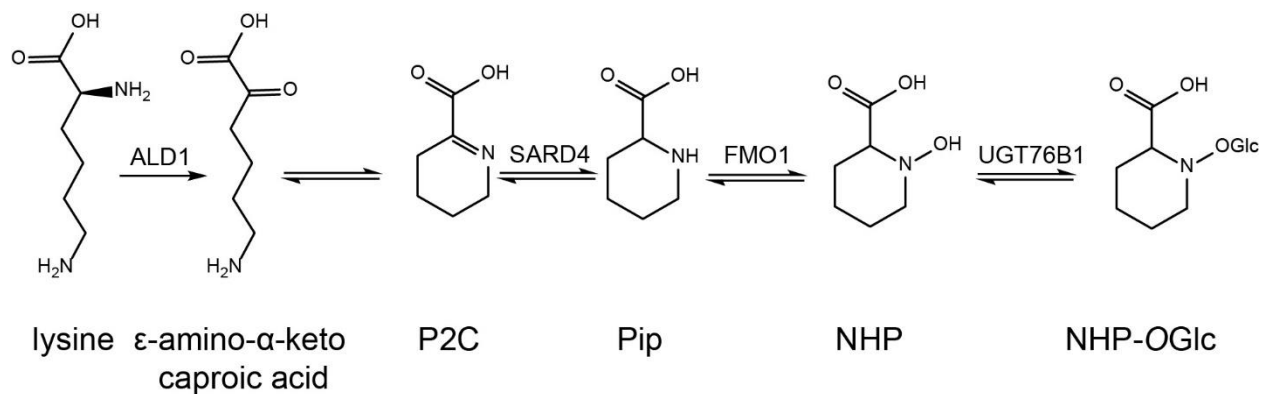

Figure 8: **Biosynthesis of NHP-OGlc.** The biosynthesis of NHP-OGlc starts from L-lysine, which is converted by ALD1 to  $\epsilon$ -amino- $\alpha$ -keto caproic acid (Navarova et al., 2012; Song et al., 2004; Vogel-Adghough et al., 2013). The compound spontaneously cyclizes to  $\Delta^1$ -piperideine-2-carboxylic acid (P2C) and is reduced by SAR-deficient 4 (SARD4) to pipercolic acid (Pip) (Ding et al., 2016; Hartmann et al., 2017). FMO1 hydroxylates pipercolic acid to form NHP, the biological active pipercolate (Chen et al., 2018; Hartmann et al., 2018). In a last step NHP is glucosylated at the hydroxyl function to form NHP-OGlc.

## Supplemental Figures and Tables

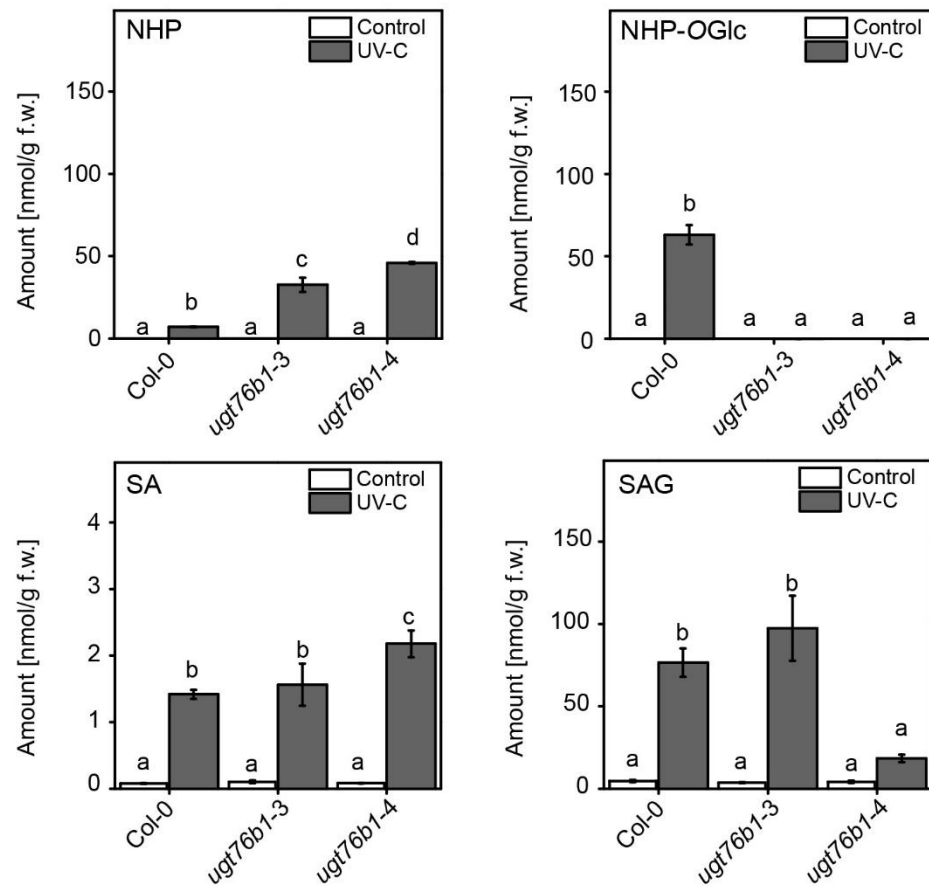

Figure S1. **CRISPR deletion mutants of *UGT76B1* are unable to synthesized NHP-OGlc after UV-treatment.** Absolute amounts of NHP, NHP-OGlc, SA and SAG were determined in wild type, *ugt76b1-3* and *ugt76b1-4* after UV-C treatment. Plants grown under long day conditions (16 hours light period), were treated for 20 min with UV-C or left untreated as control. 24 hours post treatment, leave material was harvested and analyzed using UPLC-nanoESI-QTRAP-MS. Letters indicate statistical differences (p < 0.05, one-way ANOVA; n=3 biological replicates).

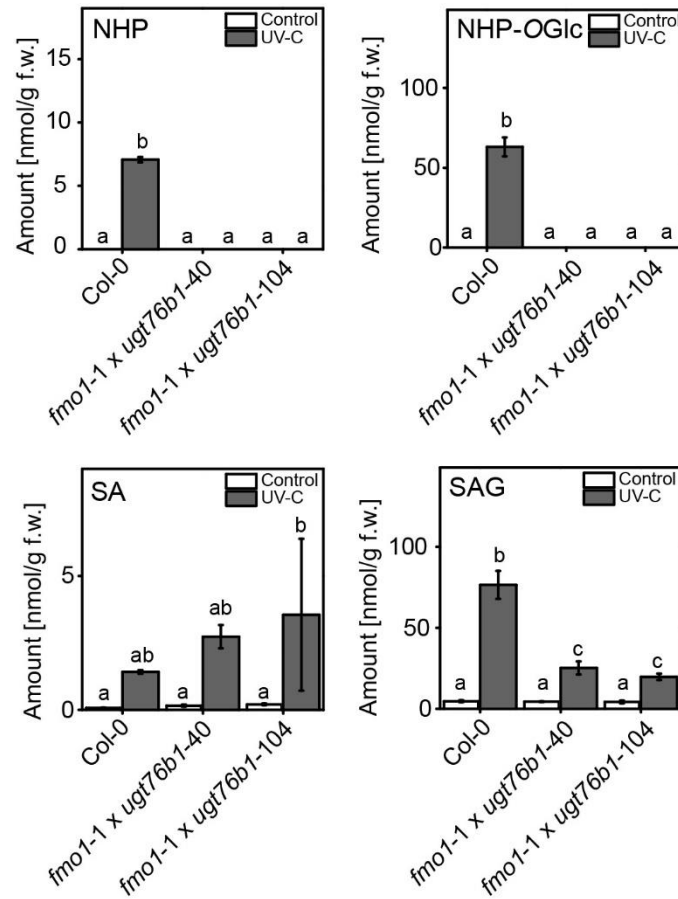

Figure S2. *fmo1-1 ugt76b1-1* double loss-of-function mutant plants synthesize neither NHP nor NHP-OGlc after UV-treatment. Absolute amounts of NHP, NHP-OGlc, SA and SAG were determined in wild type and two independent *fmo1-1 ugt76b1* lines after UV-C treatment. Plants grown under long day conditions (16 hours light period), were treated for 20 min with UV-C or left untreated as control. 24 hours post treatment leaf material was harvested and analyzed using UPLC-nanoESI-QTRAP-MS. Letters indicate statistical differences (p < 0.05, one-way ANOVA; n=3 biological replicates).

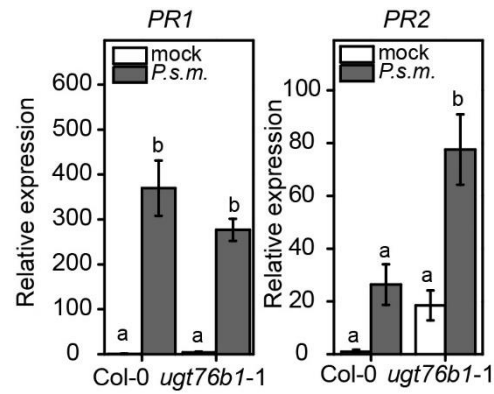

Figure S3. **Transcripts levels of *PR1* and *PR2* after infection with *P.s.m.* in *ugt76b1* and wild type.** Relative amount of transcripts of *PR1* and *PR1* was analyzed in wild type and *ugt76b1-1* plants after infection with *P.s.m.* ES4326. Three leaves of 4-6 week-old plants were treated with *P.s.m.* ES4326 ( $OD_{600}=0.001$ ). Leaves were harvested 24 hours post infiltration and analyzed for the level of transcripts via quantitative RT-PCR. Letters indicate statistical differences ( $p < 0.05$ , one-way ANOVA;  $n=3$  biological replicates).

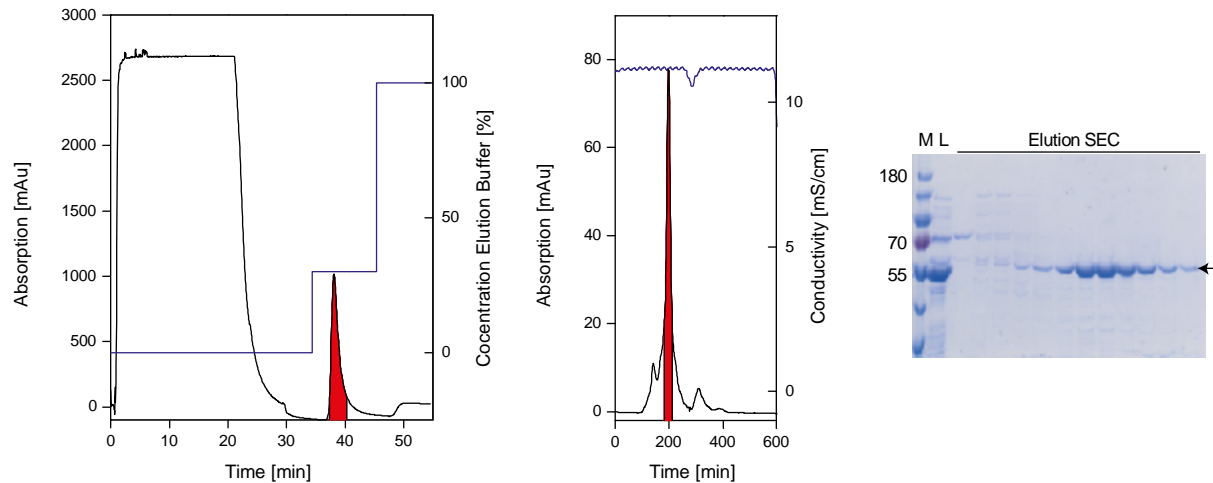

**Figure S4. Purification of UGT76B1 heterologously expressed in *E. coli*.** UGT76B1 fused with an N-terminal His-tag was heterologously expressed in *E. coli* BL21 Star (DE3) and purified via a combination of immobilized metal affinity chromatography (IMAC) and size exclusion chromatography (SEC). Chromatograms illustrate the absorption at 280 nm in milli absorption units (mAU) during protein elution. Secondary y-axes indicate the concentration of elution buffer in % for IMAC or the conductivity in mS/cm for SEC. Red areas represent corresponding signals to UGT76B1. The sodium dodecyl sulfate polyacrylamide gel electrophoresis (SDS-PAGE) shows the corresponding protein marker M, the load L (eluate IMAC) and the elution after SEC. The arrow indicates UGT76B1. The depicted purification is representative for at least three independent purifications.

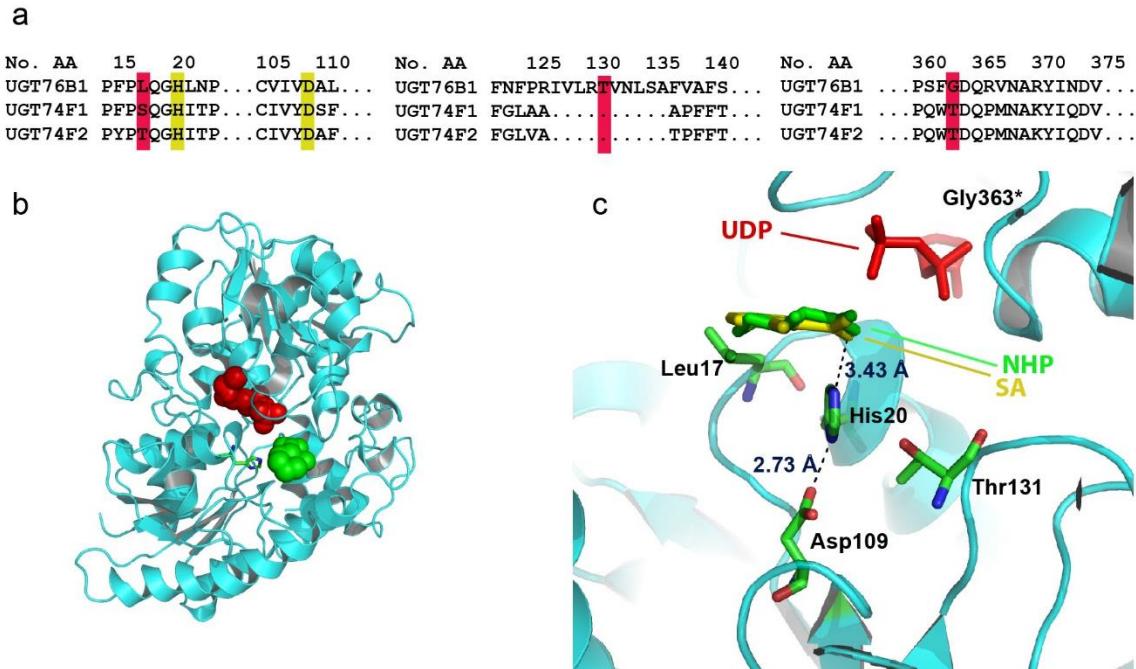

**Figure S5. Modeling of NHP into the SA-analogues electron density in the predicted *in silico* UGT76B1 model.** (a) Protein sequence alignment comparing UGT76B1, UGT74F1 and UGT74F2 towards the putative active site residues. Sequence identities are shown in yellow and miss matches in red. (b) Predicted model of UGT76B1 complexed with UDP and NHP using the deposited PDB structure 5V2J of UGT74F2 complexed with UDP and SA. UDP is shown as balls in red and the modeled NHP is shown as balls in green. His20 is shown as sticks. (c) Amino acids histidine (His<sup>20</sup>), aspartate (Asp<sup>109</sup>) and putatively threonine (Thr<sup>131</sup>), which may form the proposed catalytic triad by George Thompson et al., 2017, are predicted to the active center and in close proximity to the substrate and each other in the UGT76B1 model prediction. The structural prediction of UGT76B1 was done by PHYR2Protein (Kelley et al., 2015). NHP was fit into the electron density of SA-analogue 2-bromobenzoic acid using Coot (Emsley and Cowtan, 2004). Figures were created using PyMol (Schrödinger LLC, USA).



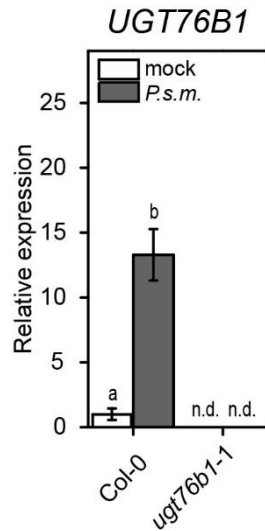

Figure S6. **Transcripts of *UGT76B1* were not present in the mutant.** Relative amount of transcripts of *UGT76B1* was analyzed in wild type and *ugt76b1-1* plants after infection with *P.s.m.* ES4326. Three leaves of 4-6 week-old plants were treated with *P.s.m.* ES4326 ( $OD_{600}=0.001$ ). Leaves were harvested 24 hours post infiltration and analyzed for the level of transcripts via quantitative RT-PCR. Letters indicate statistical differences ( $p < 0.05$ , one-way ANOVA;  $n=3$  biological replicates).

**Table S1. List of primers used in this work.** Information is divided by primer application for quantitative PCR analysis, genotyping, and cloning.

Real time PCR-primers

| Gene ID   | Forward primer                          | Reverse primer                         |
|-----------|-----------------------------------------|----------------------------------------|
| AT2G37620 | ACT1-F: cgatgaagctcaatccaaacga          | ACT1-R: cagagtcgagcacaataccg           |
| AT2G14610 | PR1-RT-F2:<br>AGGCAACTGCAGACTCATAC      | PR1-RT-R2:<br>TTGTTACACCTCACTTTGGC     |
| AT4G39030 | EDS5-F101-RT:<br>GCCAAACAGGACAAGAAAGAAG | EDS5-R102-RT:<br>GCCGAAACAATCTGTGAAGC  |
| AT5G13320 | PBS3-F101-RT:<br>CTAAGTTCTGGAATTCTGG    | PBS3-R102-RT:<br>CATGACTGAAGCAAAGATGG  |
| AT2G13810 | ALD1-F101-RT:<br>TTCCAAGGCTAGTTTGGAC    | ALD1-R102-RT:<br>GCCTAAGAGTAGCTGAAGACG |
| AT1G19250 | FMO1-F101-RT:<br>GGAGATATTCAGTGGCATGC   | FMO1-R102-RT:<br>TTTGTTAGGCCTATCATGG   |
| AT1G73805 | SARD1-RT-NF:<br>TCAAGGCGTTGTGTTTGTG     | SARD1-RT-NR:<br>CGTCAACGACGGATAGTTTC   |
| AT3G11340 | 11340-RT-F:<br>GGATTGTTCTCCGAACCGTTA    | 11340-RT-R:<br>GTGAGTCTGCCTTAGTCTCTTG  |

Genotyping primers

| Lines                | Forward primer                               | Reverse primer                               |
|----------------------|----------------------------------------------|----------------------------------------------|
| CRISPR ugt76b1 lines | 11340-hetr-F:<br>GATCGAATCAGCATAATG          | 11340-heter-R:<br>GTGTCTGATTATGGGAATGC       |
| CRISPR ugt76b1 lines | 11340-homo-F:<br>GAATGAAGGATCTTCCATGG        | 11340-heter-R:<br>GTGTCTGATTATGGGAATGC       |
| SAIL_1171_A11        | SAIL1171A11-tdna-F:<br>TCAGGAATCATATTCAACGCC | SAIL1171A11-tdna-R:<br>GCTGAAGACTAAGCGTCATGC |

Cloning primers

| Purpose                                       | Primer               | Sequence                                                          |
|-----------------------------------------------|----------------------|-------------------------------------------------------------------|
| CRISPR-deletion<br>( <i>UGT76B1</i> )         | 3G11340-BsFF0        | ATATATGGTCTCGATTGTCTTCC<br>CTTTCCCTTACAGTTTTAGAGC<br>TAGAAATAGC   |
| CRISPR-deletion<br>( <i>UGT76B1</i> )         | 3G11340-BsRR0        | ATTATTGGTCTCGAAACCTTCCG<br>AGCTCGTCATTAGCAATCTCTTA<br>GTCGACTCTAC |
| Heterologous expression<br>( <i>UGT76B1</i> ) | UGT76B1 BamHI for    | acgGGATCCATGGAGACTAGAG<br>AAACA                                   |
| Heterologous expression<br>( <i>UGT76B1</i> ) | UGT76B1 Sall reverse | acgGTCGACTTAGAAAGACAATA<br>TATAAGCA                               |

Table S2. **Multiple reaction monitoring parameters for absolute quantification of analytes.** For the presented quantitative plant hormone data we established a multiple reaction monitoring analysis of seven additional analytes to the ones published before (Herrfurth and Feussner, 2020). Information are divided for mass spectrometric analysis after negative ionization or positive ionization. Q1 (precursor ion), Q3 (product ion) and the retention time (RT) of each analyte are shown, respectively. Furthermore, the declustering potential (DP), entrance potential (EP), collision energy (CE) and the cell exit potential (CXP) of each compound are provided.

negative nanoESI

| <b>Q1<br/>(m/z)</b> | <b>Q3<br/>(m/z)</b> | <b>RT<br/>(min)</b> | <b>Analyte</b>                    | <b>DP<br/>(eV)</b> | <b>EP<br/>(eV)</b> | <b>CE<br/>(eV)</b> | <b>CXP<br/>(eV)</b> |
|---------------------|---------------------|---------------------|-----------------------------------|--------------------|--------------------|--------------------|---------------------|
| 137                 | 93                  | 2                   | SA                                | -25                | -6                 | -20                | -10                 |
| 141                 | 97                  | 3                   | D <sub>4</sub> -SA                | -25                | -6                 | -22                | -6                  |
| 144                 | 82                  | 0.7                 | NHP                               | -60                | -8                 | -15                | -13                 |
| 153                 | 90                  | 0.7                 | D <sub>9</sub> -NHP               | -60                | -8                 | -15                | -13                 |
| 299                 | 137                 | 1                   | SAG                               | -30                | -4                 | -18                | -2                  |
| 305                 | 137                 | 1                   | <sup>13</sup> C <sub>6</sub> -SAG | -30                | -4                 | -18                | -2                  |
| 306                 | 89                  | 0.9                 | NHP-OGlc                          | -65                | -4                 | -18                | -13                 |

positive nanoESI

| <b>Q1<br/>(m/z)</b> | <b>Q3<br/>(m/z)</b> | <b>RT<br/>(min)</b> | <b>Analyte</b>      | <b>DP<br/>(eV)</b> | <b>EP<br/>(eV)</b> | <b>CE<br/>(eV)</b> | <b>CXP<br/>(eV)</b> |
|---------------------|---------------------|---------------------|---------------------|--------------------|--------------------|--------------------|---------------------|
| 130                 | 84                  | 0.7                 | PIP                 | 90                 | 8                  | 22                 | 4                   |
| 139                 | 93                  | 0.7                 | D <sub>9</sub> -PIP | 90                 | 8                  | 22                 | 4                   |
